# Supplementary material for: Online e-learning during the COVID-19 lockdown in Trinidad and Tobago: prevalence and associated factors with ocular complaints among schoolchildren aged 11–19 years
Source: PeerJ. 2022 Jun 6;10:e13334. doi: 10.7717/peerj.13334 (PMC9179615; doi:10.7717/peerj.13334)
Supplement: Supplemental Information 4 [file peerj-10-13334-s004.xlsx]

## Sheet: Form responses 1
Timestamp	How old are you?	What is your gender?	Are you a citizen of Trinidad?	What is your ethnicity?	What is the nature of community in which you live?	How long have you been living in Trinidad?	Form ID	What form are you in?	SchoolID	Did you use a digital device for schooling during COVID 19 Pandemic?	If yes, what Digital Device was used ?	Tablet/iPad	Laptop/desktops	Phones	Before the closure of school due to COVID-19, How many hours a day on average, did you spend on your digital device daily?	Before the closure of school due to COVID-19_Coded hours of use	How many hours a day on average, do you spend on your digital device daily as online teaching is taking place?	hours a day on digital device when online teaching is taking place?_Coded	Do you wear glasses or contact lens?	User of spectacles or CL (1=yes, 0=no)	Wears glasses/CL while using digital device (Yes=1, No=0, not applicable=-1)	Posture_Sitting (Yes=1, No=0)	Posture_Laying down	standing	combination posture	What is your preferred position while using your digital device for schooling during COVID 19?	How long do you spend in that preferred position while using your digital device?	Do you have problems seeing at near or distance?	Do you have any eye turns? (Eyes turned inward or outward and commonly known as a "lazy eye" or "kokey eye")	Do you currently experience headaches with the use of your digital device?	Do you currently experience dry/gritty eyes (feeling as though something is in your eyes) with use of your digital device ?	Do you currently experience itchy with the use of your digital device?	Do you currently experience blurry vision with the use of your digital device?	Do you currently experience double vision with the use of your digital device?	Took actions to resolve symptoms above on your own?	Action taken to resolve complaints	If yes, What did you do to resolve the symptoms experienced?	When was your last eye exam?	What was the nature of the treatment?	Treatment type
2021-03-24 09:24:38	14-15	Male	Yes	Indo-Trinidad	Rural area	5 years & above	2	Form 3	6	Yes	Phone	0	0	1	2-4 hours	2-4hrs	4-6 hours	4-6hrs	Neither glasses nor contact lenses	0	-1	1	0	0	0	Sitting	1 - 2 hours	I see well both near and distance	No	No	No	No	Yes	No	No	————————————	——————————————————————————	More than 2 years ago	Eye exam	No treatment
2021-03-22 09:09:42	14-15	Female	Yes	Indo-Trinidad	Urban area	5 years & above	2	Form 2	1	Yes	Desktop	0	1	0	1-2 hours	<2hrs	4-6 hours	4-6hrs	Neither glasses nor contact lenses	0	-1	1	0	0	0	Sitting	4 - 6 hours	I see well both near and distance	No	Yes	Yes	No	Yes	No	Yes	Breaks	Well i just take a break sometimes, just to get away from the screen cause, that really helps, Not all the time will the symptoms go away, but my school work is priority so i just really push with my work, pain or no pain, and that's the mentality that my pairs also have.	More than a year ago
2021-03-08 19:15:07	14-15	Male	Yes	Afro-Trinidadian	Urban area	5 years & above	6	Form 2	3	Yes	Phone	0	0	1	More than 6 hours	>6hrs	2-4 hours	2-4hrs	Neither glasses nor contact lenses	0	-1	1	0	0	0	Sitting	1 - 2 hours	I see well both near and distance	No	Yes	Yes	Yes	Yes	Yes	Yes	Breaks	Was told to look away from the screen for a while and then repeat after an hour.	More than 2 years ago	Glasses	Spectacles
2021-03-02 12:21:59	14-15	Male	Yes	Mixed	Rural area	5 years & above	1	Form 2	4	Yes	Phone	0	0	1	1-2 hours	<2hrs	Less than an hour	<2hrs	Neither glasses nor contact lenses	0	-1	1	0	0	0	Sitting	2 - 4 hours	I see well both near and distance	No	Yes	Yes	No	Yes	No	Yes	Breaks	Try to not be on your device much, I mean, sometimes you have no choice cause it’s your only way to connect and do classes and stuff but staring at a screen for the entire day is so bad for your eyes and causes headaches.	Within the last year	Glasses	Spectacles
2021-03-22 08:46:56	12-13	Female	Yes	Afro-Trinidadian	Urban area	5 years & above	5	Form 2	5	Yes	Phone And Laptop	0	1	1	More than 6 hours	>6hrs	4-6 hours	4-6hrs	Neither glasses nor contact lenses	0	-1	1	1	1	1	Sitting, Standing, Laying down	1 - 2 hours	Distance	No	Yes	Yes	No	Yes	Yes	Yes	Breaks	Try to not be on my phone much but that didn't work because I have school	Never had an eye exam	Don't have any treatment	No treatment
2021-03-20 18:07:23	12-13	Female	Yes	Afro-Trinidadian	Urban area	5 years & above	1	Form 2	5	Yes	Phone And Laptop	0	1	1	More than 6 hours	>6hrs	4-6 hours	4-6hrs	Neither glasses nor contact lenses	0	-1	1	1	1	1	Sitting, Standing, Laying down	1 - 2 hours	Distance	No	Yes	Yes	Yes	Yes	No	Yes	Breaks	Try to get some sleep	More than 2 years ago
2021-03-02 19:29:24	14-15	Female	Yes	Indo-Trinidad	Urban area	5 years & above	6	Form 2	5	Yes	Laptop/Macbook	0	1	0	2-4 hours	2-4hrs	12	>6hrs	Neither glasses nor contact lenses	0	-1	1	0	0	0	Sitting	More than 6 hours	I see well both near and distance	No	Yes	Yes	Yes	Yes	No	Yes	Breaks	try taking breaks	More than 2 years ago
2021-03-22 10:19:44	14-15	Female	Yes	Afro-Trinidadian	Rural area	5 years & above	3	Form 3	1	Yes	Phone	0	0	1	4-6 hours	4-6hrs	4-6 hours	4-6hrs	Neither glasses nor contact lenses	0	-1	0	1	0	0	Laying down	1 - 2 hours	I see well both near and distance	No	No	Yes	No	No	No	Yes	Breaks	Tried less screen time	Never had an eye exam
2021-03-24 09:02:27	14-15	Male	Yes	Indo-Trinidad	Urban area	5 years & above	5	Form 3	2	Yes	Phone	0	0	1	More than 12 hours	>6hrs	4-6 hours	4-6hrs	Glasses	1	1	1	0	0	0	Sitting	4 - 6 hours	Distance	No	Yes	Yes	Yes	Yes	Yes	Yes	Breaks	Took breaks on and off when looking at the screen	Within the last 6 months	Glasses	Spectacles
2021-03-22 10:08:59	16-17	Female	No	Afro-Trinidadian	Urban area	1-2 years	4	Form 3	7	Yes	Laptop/Macbook	0	1	0	4-6 hours	4-6hrs	4-6 hours	4-6hrs	Neither glasses nor contact lenses	0	0	1	1	0	1	Sitting, Laying down	4 - 6 hours	I see well both near and distance	No	Yes	Yes	Yes	Yes	No	Yes	Breaks	To resolve the symptoms, I took more frequent breaks while using my devices, I took more naps after online classes and I also started spending less unnecessary time on my devices.	Within the last year	Glasses	Spectacles
2021-03-03 00:50:48	16-17	Male	Yes	Syrian/Lebanese	Urban area	3-4 years	4	Form 4	1	No	Desktop	0	1	0	4-6 hours	4-6hrs	4-6 hours	4-6hrs	Both contact lenses and spectacles	1	0	1	0	0	0	Sitting	1 - 2 hours	Distance	Outward	Yes	Yes	No	No	Yes	Yes	Breaks	To resolve the symptoms experienced, I close and relax my eyes for a short period of time, take frequent breaks when using devices and reduce my screen time after school.	Within the last year
2021-03-10 22:02:12	16-17	Female	Yes	Other	Rural area	5 years & above	2	Form 5	5	Yes	Laptop/Macbook	0	1	0	More than 6 hours	>6hrs	13 hours	>6hrs	Neither glasses nor contact lenses	0	-1	1	0	0	0	Sitting	4 - 6 hours	I see well both near and distance	No	Yes	No	No	Yes	Yes	Yes	Breaks	Take my eyes off the computer for approximately a minute or more, whenever possible.	Free basic screening given at various locations.
2021-03-02 19:26:40	16-17	Female	Yes	Mixed	Urban area	5 years & above	7	Form 6	3	Yes	Laptop/Macbook	0	1	0	2-4 hours	2-4hrs	More than 7 hours	>6hrs	Neither glasses nor contact lenses	0	0	1	0	0	0	Sitting	4 - 6 hours	Distance	No	Yes	No	Yes	No	No	Yes	Breaks	take frequent breaks away from the screen	More than 2 years ago
2021-03-02 19:02:36	18-19	Male	Yes	Indo-Trinidad	Urban area	5 years & above	7	Form 6	5	Yes	Laptop/Macbook	0	1	0	4-6 hours	4-6hrs	8+ hours	>6hrs	Glasses	1	1	1	0	0	0	Sitting	More than 6 hours	Distance	No	Yes	Yes	Yes	Yes	Yes	Yes	Breaks	Take days off from school	More than 2 years ago
2021-03-22 10:21:16	14-15	Female	Yes	Mixed	Urban area	5 years & above	1	Form 3	5	Yes	Laptop/Macbook	0	1	0	Less than an hour	<2hrs	7-9 hours	>6hrs	Glasses	1	1	1	1	0	1	Sitting, Laying down, Other	Less than 1 hour	I see well both near and distance	No	Yes	Yes	Yes	Yes	Yes	Yes	Breaks	Take days off from school	More than 2 years ago
2021-03-02 20:24:02	14-15	Female	Yes	Mixed	Rural area	5 years & above	6	Form 3	3	Yes	Phone	0	0	1	2-4 hours	2-4hrs	4-6 hours	4-6hrs	Glasses	1	-1	1	0	0	0	Sitting	1 - 2 hours	I see well both near and distance	No	Yes	Yes	Yes	Yes	Yes	Yes	Breaks	Take days off from school	More than 2 years ago
2021-03-24 08:54:55	14-15	Female	Yes	Mixed	Urban area	5 years & above	7	Form 3	6	Yes	Laptop/Macbook	0	1	0	2-4 hours	2-4hrs	4-6 hours	4-6hrs	Glasses	1	1	1	0	0	0	Sitting	4 - 6 hours	Distance	Outward	Yes	Yes	Yes	Yes	Yes	Yes	Breaks	Take days off from school	More than 2 years ago
2021-03-19 10:34:51	16-17	Female	Yes	Afro-Trinidadian	Urban area	5 years & above	3	Form 5	5	Yes	Phone	0	0	1	4-6 hours	4-6hrs	8 hours	>6hrs	Glasses	1	0	1	0	0	0	Sitting	4 - 6 hours	Distance	No	Yes	Yes	No	Yes	Yes	Yes	Breaks	take breaks, take a shower, sleep	Within the last 6 months
2021-03-02 19:27:54	16-17	Male	Yes	Indo-Trinidad	Urban area	5 years & above	6	Form 6	7	Yes	Laptop/Macbook	0	1	0	2-4 hours	2-4hrs	4-6 hours	4-6hrs	Glasses	1	1	1	0	0	0	Sitting	1 - 2 hours	Distance	No	No	No	No	Yes	No	Yes	Breaks	Take breaks often	Within the last year	None	None
2021-03-22 10:23:12	14-15	Female	Yes	Afro-Trinidadian	Urban area	5 years & above	3	Form 3	2	Yes	Phone	0	0	1	More than 6 hours	>6hrs	2-4 hours	2-4hrs	Glasses	1	1	1	0	0	0	Sitting	More than 6 hours	I see well both near and distance	No	Yes	No	Yes	Yes	Yes	Yes	Breaks	Take brakes in between clases from digital screens.	Within the last year
2021-03-20 18:27:57	14-15	Female	Yes	Indo-Trinidad	Rural area	5 years & above	7	Form 2	4	Yes	Laptop/Macbook	0	1	0	2-4 hours	2-4hrs	1-2 hours	<2hrs	Glasses	1	1	1	0	0	0	Sitting	2 - 4 hours	I see well both near and distance	No	No	No	No	No	No	Yes	Breaks	Take a cold shower and a nice sleep	Never had an eye exam	Eye drops	Medication
2021-03-16 14:08:00	14-15	Female	Yes	Indo-Trinidad	Urban area	5 years & above	4	Form 3	2	Yes	Phone	0	0	1	1-2 hours	<2hrs	4-6 hours	4-6hrs	Neither glasses nor contact lenses	0	0	1	0	0	0	Sitting	Less than 1 hour	Distance	No	Yes	No	No	No	No	Yes	Breaks	take a break from the screen	More than a year ago	Glasses	Spectacles
2021-03-02 18:17:42	18-19	Male	Yes	Indo-Trinidad	Urban area	5 years & above	1	Form 6	3	Yes	Tablet/iPad	1	0	0	4-6 hours	4-6hrs	4-6 hours	4-6hrs	Glasses	1	1	1	0	0	0	Sitting	1 - 2 hours	Distance	No	Yes	No	Yes	Yes	No	Yes	Breaks	Stop looking at the screen for a while	More than 2 years ago	Vision Therapy	VT
2021-03-09 07:22:59	14-15	Female	Yes	Indo-Trinidad	Rural area	5 years & above	3	Form 2	4	Yes	Laptop/Macbook	0	1	0	1-2 hours	<2hrs	4-6 hours	4-6hrs	Glasses	1	1	1	0	0	0	Sitting	1 - 2 hours	Near	No	Yes	Yes	Yes	Yes	Yes	Yes	Breaks	staying away from the computer	Within the last 6 months	Glasses	Spectacles
2021-03-02 20:32:23	14-15	Female	Yes	Mixed	Urban area	5 years & above	6	Form 4	4	Yes	Laptop/Macbook	0	1	0	2-4 hours	2-4hrs	6-7 hours	>6hrs	Glasses	1	1	1	0	0	0	Sitting	More than 6 hours	Distance	No	Yes	No	No	Yes	Yes	Yes	Breaks	Staying away from a device for a few hours	More than 2 years ago
2021-03-23 09:05:46	16-17	Male	Yes	Indo-Trinidad	Urban area	5 years & above	7	Form 4	7	Yes	Laptop/Macbook	0	1	0	More than 6 hours	>6hrs	About 18hrs a day	>6hrs	Glasses	1	1	1	0	0	0	Sitting	More than 6 hours	I see well both near and distance	No	Yes	Yes	Yes	Yes	No	Yes	Breaks	Stay away from devices	Within the last 6 months	Glasses	Spectacles
2021-03-02 19:37:38	16-17	Female	Yes	Indo-Trinidad	Urban area	5 years & above	7	Form 4	7	Yes	Laptop/Macbook	0	1	0	1-2 hours	<2hrs	4-6 hours	4-6hrs	Glasses	1	1	1	0	0	0	Sitting	1 - 2 hours	Distance	No	Yes	Yes	No	Yes	No	Yes	Breaks	Spend less time on my devices and her enough sleep	Within the last 6 months	Glasses	Spectacles
2021-03-08 22:48:03	14-15	Female	Yes	Mixed	Rural area	5 years & above	2	Form 2	5	Yes	Phone	0	0	1	2-4 hours	2-4hrs	2-4 hours	2-4hrs	Glasses	1	1	1	1	0	1	Sitting, Laying down	2 - 4 hours	Distance	No	Yes	Yes	Yes	Yes	Yes	Yes	Breaks	sometimes I try to avoid my computer screen but it is inevitable	More than 2 years ago	Eye drops	Medication
2021-03-02 12:47:29	12-13	Male	Yes	Indo-Trinidad	Rural area	5 years & above	5	Form 2	5	Yes	Laptop/Macbook	0	1	0	More than 6 hours	>6hrs	4-6 hours	4-6hrs	Glasses	1	1	1	0	0	0	Sitting	2 - 4 hours	Distance	No	Yes	Yes	Yes	Yes	No	Yes	Breaks	Sleep	More than a year ago
2021-03-23 09:06:53	14-15	Prefer not to say	Yes	Indo-Trinidad	Rural area	5 years & above	2	Form 4	1	Yes	Phone	0	0	1	More than 6 hours	>6hrs	4-6 hours	4-6hrs	Glasses	1	0	1	1	0	1	Sitting, Laying down	4 - 6 hours	Distance	Inward	Yes	Yes	Yes	No	Yes	Yes	Breaks	Sitting and Relaxing	Within the last year	Glasses	Spectacles
2021-03-09 09:43:05	16-17	Female	Yes	Indo-Trinidad	Urban area	5 years & above	1	Form 4	6	Yes	Laptop/Macbook	0	1	0	2-4 hours	2-4hrs	8-10 hours	>6hrs	Glasses	1	1	1	0	0	0	Sitting	More than 6 hours	Distance	No	Yes	Yes	No	Yes	No	Yes	Breaks	Resting eyes and eye exercise	Within the last 6 months	Glasses	Spectacles
2021-03-02 20:15:12	18-19	Female	Yes	Indo-Trinidad	Rural area	5 years & above	5	Form 6	5	Yes	Laptop/Macbook	0	1	0	2-4 hours	2-4hrs	4-6 hours	4-6hrs	Glasses	1	1	1	0	0	0	Sitting	1 - 2 hours	Distance	No	Yes	Yes	No	No	No	Yes	Breaks	Rest.	More than a year ago
2021-03-02 18:12:40	16-17	Male	Yes	Indo-Trinidad	Urban area	5 years & above	6	Form 4	2	Yes	Laptop/Macbook	0	1	0	4-6 hours	4-6hrs	4-6 hours	4-6hrs	Glasses	1	1	1	0	0	0	Sitting	4 - 6 hours	I see well both near and distance	No	Yes	Yes	Yes	No	No	Yes	Breaks	Rest my eyes for while, like take a short sleep.	Within the last year	Glasses	Spectacles
2021-03-21 20:29:41	16-17	Female	Yes	Afro-Trinidadian	Rural area	5 years & above	5	Form 5	4	Yes	Desktop	0	1	0	4-6 hours	4-6hrs	12 hours	>6hrs	Glasses	1	0	1	0	0	0	Sitting	More than 6 hours	Distance	No	Yes	No	Yes	Yes	No	Yes	Breaks	Rest my eyes	More than 2 years ago	Glasses	Spectacles
2021-03-12 18:22:56	12-13	Female	Yes	Mixed	Urban area	5 years & above	5	Form 1	7	Yes	Laptop/Macbook	0	1	0	1-2 hours	<2hrs	1-2 hours	<2hrs	Glasses	1	-1	1	0	0	0	Sitting	2 - 4 hours	Distance	No	Yes	No	No	No	Yes	Yes	Breaks	Monitor my contact hours on digital devices also getting more sleep in between classes/ studying.	Within the last year	Glasses	Spectacles
2021-03-01 08:35:43	14-15	Male	Yes	Mixed	Urban area	5 years & above	5	Form 2	1	Yes	Laptop/Macbook	0	1	0	More than 6 hours	>6hrs	4-6 hours	4-6hrs	Both contact lenses and spectacles	1	1	1	1	0	1	Sitting, Laying down	2 - 4 hours	Distance	No	Yes	Yes	Yes	Yes	Yes	Yes	Breaks	I've tried looking away then looking back whether it was writing or whatever but when I looked back my eyes would hurt and sometimes get teary. I've even tried washing my eyes and eye drops but nothing would help so I just deal with it.	More than a year ago	Glasses	Spectacles
2021-03-20 17:56:07	12-13	Female	Yes	Indo-Trinidad	Rural area	5 years & above	7	Form 2	2	Yes	Desktop	0	1	0	2-4 hours	2-4hrs	4-6 hours	4-6hrs	Glasses	1	1	1	0	0	0	Sitting	2 - 4 hours	Distance	No	Yes	Yes	No	Yes	Yes	Yes	Breaks	I try to spend less time on my devices. I try to put the device as far as I possibly can.	More than 2 years ago
2021-03-02 19:37:37	14-15	Female	Yes	Indo-Trinidad	Urban area	5 years & above	7	Form 3	1	Yes	Phone	0	0	1	4-6 hours	4-6hrs	Honestly the entire day, cause assignments are always being sent	>6hrs	Glasses	1	1	1	1	0	1	Sitting, Laying down	More than 6 hours	Distance	No	Yes	Yes	No	Yes	Yes	Yes	Breaks	I Took breaks in between screen time	I cant remember 😅
2021-03-09 12:47:23	14-15	Female	Yes	Mixed	Urban area	5 years & above	5	Form 3	1	Yes	Laptop/Macbook	0	1	0	2-4 hours	2-4hrs	2-4 hours	2-4hrs	Glasses	1	1	1	0	0	0	Sitting	2 - 4 hours	Distance	No	Yes	Yes	Yes	Yes	Yes	Yes	Breaks	I took breaks for longer periods of time and I used eye drops. I also visited the optometrist and actually had my prescription adjusted twice in the past year.	Within the last 6 months	glasses and eye drops	Spectacles
2021-03-23 09:05:10	16-17	Male	Yes	Other	Urban area	5 years & above	4	Form 4	3	Yes	Laptop/Macbook	0	1	0	2-4 hours	2-4hrs	4-6 hours	4-6hrs	Glasses	1	1	1	0	0	0	Sitting	1 - 2 hours	Distance	No	Yes	Yes	Yes	Yes	No	Yes	Breaks	I rested my eyes when on the computer more often and I took more breaks away from electronic devices.	Within the last 6 months	Glasses	Spectacles
2021-03-23 09:16:15	16-17	Male	Yes	Indo-Trinidad	Urban area	5 years & above	7	Form 4	5	Yes	Laptop/Macbook	0	1	0	Less than an hour	<2hrs	about 12 hours	>6hrs	Neither glasses nor contact lenses	0	-1	1	0	0	0	Sitting	Less than 1 hour	Distance	No	No	No	No	Yes	No	Yes	Breaks	I look away firm the screen for a while	Within the last 6 months
2021-03-13 10:56:10	16-17	Female	Yes	Mixed	Rural area	5 years & above	5	Form 4	7	Yes	Phone	0	0	1	Less than an hour	<2hrs	15 hours	>6hrs	Glasses	1	1	1	0	0	0	Sitting	More than 6 hours	I see well both near and distance	No	Yes	Yes	Yes	No	No	Yes	Breaks	I eased up on social media and I take a break from my device every 20 minutes.	Within the last year
2021-03-16 14:11:28	16-17	Female	Yes	Mixed	Rural area	5 years & above	2	Form 5	3	Yes	Tablet/iPad	1	0	0	1-2 hours	<2hrs	4-6 hours	4-6hrs	Glasses	1	0	1	0	0	0	Sitting	4 - 6 hours	Distance	No	Yes	Yes	Yes	No	No	Yes	Breaks	Get up and move away from the screen for a while.	More than a year ago	Vision Therapy	VT
2021-03-08 20:49:16	16-17	Female	Yes	Indo-Trinidad	Urban area	5 years & above	3	Form 5	7	No	Laptop/Macbook	0	1	0	1-2 hours	<2hrs	9-10 hours	>6hrs	Glasses	1	1	1	0	0	0	Sitting	4 - 6 hours	I see well both near and distance	No	Yes	Yes	Yes	Yes	Yes	Yes	Breaks	Frequent breaks	More than a year ago
2021-03-22 11:28:36	16-17	Female	Yes	Indo-Trinidad	Urban area	5 years & above	1	Form 6	2	Yes	Laptop/Macbook	0	1	0	1-2 hours	<2hrs	4-6 hours	4-6hrs	Glasses	1	1	1	0	0	0	Sitting	Less than 1 hour	Distance	No	Yes	No	No	No	No	Yes	Breaks	For my headaches I would just come off of my device for a while and take a rest so I am not adding to the strain that my eye is experience .	More than 2 years ago
2021-03-02 19:44:24	16-17	Male	Yes	Afro-Trinidadian	Urban area	5 years & above	4	Form 6	3	Yes	Tablet/iPad	1	0	0	More than 6 hours	>6hrs	2-4 hours	2-4hrs	Glasses	1	1	1	1	0	1	Sitting, Laying down	More than 6 hours	Near	No	Yes	No	No	No	No	Yes	Breaks	Exercise to get my blood pumping, taking an extra hour of sleep, eating more vegetables and fruits, and drinking more water	More than 2 years ago
2021-03-16 21:24:50	18-19	Female	Yes	Afro-Trinidadian	Urban area	5 years & above	1	Form 6	4	Yes	Laptop/Macbook	0	1	0	2-4 hours	2-4hrs	4-6 hours	4-6hrs	Glasses	1	1	0	1	0	0	Laying down	2 - 4 hours	Near	No	Yes	No	No	Yes	Yes	Yes	Breaks	Every 5 mins I take a look around getting my eyes if the screen, and after school I meditate to relieve stress on my eyes and mind.	Within the last 6 months
2021-02-26 20:34:30	12-13	Male	Yes	Indo-Trinidad	Rural area	5 years & above	6	Form 1	1	Yes	Laptop/Macbook	0	1	0	Less than an hour	<2hrs	4-6 hours	4-6hrs	Glasses	1	1	1	0	0	0	Sitting	4 - 6 hours	Distance	No	Yes	No	No	No	No	Yes	Breaks	close my eyes for 10 minutes	More than 2 years ago
2021-03-02 09:29:23	12-13	Male	Yes	Mixed	Rural area	5 years & above	5	Form 1	2	Yes	Laptop/Macbook	0	1	0	4-6 hours	4-6hrs	4-6 hours	4-6hrs	Glasses	1	1	1	0	0	0	Sitting	4 - 6 hours	Distance	No	Yes	No	Yes	Yes	No	Yes	Breaks	close eyes and rest a few minutes wash face with water and pat on eyes	Within the last year	baby shampoo to wash eyelashes from dust	Others
2021-03-22 10:25:44	12-13	Female	Yes	Indo-Trinidad	Urban area	5 years & above	1	Form 1	4	Yes	Laptop/Macbook	0	1	0	1-2 hours	<2hrs	4-6 hours	4-6hrs	Neither glasses nor contact lenses	0	-1	1	0	0	0	Sitting	Less than 1 hour	Distance	No	No	No	No	Yes	Yes	No	Breaks	Came off my phone	More than a year ago
2021-03-01 16:17:22	12-13	Male	Yes	Indo-Trinidad	Rural area	5 years & above	5	Form 1	6	Yes	Tablet/iPad	1	0	0	More than 6 hours	>6hrs	4-6 hours	4-6hrs	Glasses	1	1	1	0	0	0	Sitting	More than 6 hours	Distance	No	Yes	Yes	No	Yes	Yes	Yes	Breaks	As soon as classes were over, I would limit using my electronic devices to the best of my abilities.	More than 2 years ago
2021-03-08 17:40:40	14-15	Male	Yes	Afro-Trinidadian	Urban area	5 years & above	6	Form 2	1	Yes	Laptop/Macbook	0	1	0	1-2 hours	<2hrs	6-8	>6hrs	Glasses	1	1	1	0	0	0	Sitting	More than 6 hours	Near	No	No	No	No	No	No	No	Breaks		More than a year ago
2021-03-02 12:42:26	14-15	Male	Yes	Indo-Trinidad	Urban area	5 years & above	1	Form 2	1	Yes	Laptop/Macbook	0	1	0	2-4 hours	2-4hrs	4-6 hours	4-6hrs	Glasses	1	1	1	0	0	0	Sitting	2 - 4 hours	Distance	No	No	No	No	No	No	No	Breaks		More than a year ago
2021-03-02 13:22:07	12-13	Male	Yes	Mixed	Urban area	5 years & above	2	Form 2	1	Yes	Laptop/Macbook	0	1	0	More than 6 hours	>6hrs	4-6 hours	4-6hrs	Glasses	1	1	1	0	0	0	Sitting	2 - 4 hours	Distance	No	No	No	No	No	No	No	Breaks		Within the last 6 months
2021-03-10 08:58:57	14-15	Male	Yes	Mixed	Rural area	5 years & above	2	Form 2	1	Yes	Phone	0	0	1	1-2 hours	<2hrs	4-6 hours	4-6hrs	Glasses	1	1	1	0	0	0	Sitting	1 - 2 hours	I see well both near and distance	No	No	No	No	No	No	No	Breaks		More than 2 years ago
2021-03-24 14:54:41	12-13	Female	Yes	Mixed	Rural area	5 years & above	2	Form 2	1	Yes	Laptop/Macbook	0	1	0	2-4 hours	2-4hrs	4-6 hours	4-6hrs	Glasses	1	-1	1	0	0	0	Sitting	2 - 4 hours	I see well both near and distance	No	Yes	Yes	No	No	No	No	Breaks		More than 2 years ago
2021-03-20 11:38:33	12-13	Female	Yes	Indo-Trinidad	Urban area	5 years & above	1	Form 2	2	Yes	Laptop/Macbook	0	1	0	4-6 hours	4-6hrs	4-6 hours	4-6hrs	Glasses	1	1	1	0	0	0	Sitting	1 - 2 hours	Distance	No	No	No	No	No	No	No	Breaks		Never had an eye exam
2021-03-08 20:49:37	12-13	Female	Yes	Indo-Trinidad	Rural area	5 years & above	1	Form 2	2	Yes	Laptop/Macbook	0	1	0	More than 6 hours	>6hrs	1-2 hours	<2hrs	Glasses	1	0	1	0	0	0	Sitting	1 - 2 hours	Near	Inward	No	No	No	No	No	No	Breaks		More than a year ago
2021-03-01 08:34:02	14-15	Male	Yes	Indo-Trinidad	Rural area	5 years & above	3	Form 2	2	Yes	Phone	0	0	1	2-4 hours	2-4hrs	2-4 hours	2-4hrs	Glasses	1	1	1	0	0	0	Sitting	2 - 4 hours	I see well both near and distance	No	Yes	No	Yes	No	No	No	Breaks		Never had an eye exam
2021-03-09 10:39:37	14-15	Prefer not to say	Yes	Indo-Trinidad	Urban area	5 years & above	1	Form 2	3	Yes	Phone	0	0	1	1-2 hours	<2hrs	4-6 hours	4-6hrs	Glasses	1	1	1	0	0	1	Sitting, Other	2 - 4 hours	Distance	No	Yes	No	No	Yes	No	No	Breaks		Never had an eye exam
2021-03-08 19:11:36	14-15	Female	Yes	Afro-Trinidadian	Urban area	5 years & above	2	Form 2	3	No	Tablet/iPad	1	0	0	More than 6 hours	>6hrs	2-4 hours	2-4hrs	Glasses	1	1	1	0	0	0	Sitting	2 - 4 hours	Distance	No	No	No	No	No	No	No	Breaks		More than 2 years ago
2021-02-27 13:58:54	12-13	Male	Yes	Indo-Trinidad	Urban area	5 years & above	3	Form 2	4	Yes	Laptop/Macbook	0	1	0	2-4 hours	2-4hrs	4-6 hours	4-6hrs	Glasses	1	1	1	0	0	0	Sitting	4 - 6 hours	Distance	No	No	No	No	No	No	No	Breaks		More than 2 years ago
2021-03-21 12:58:26	12-13	Female	Yes	Mixed	Rural area	5 years & above	3	Form 2	4	Yes	Tablet/iPad	1	0	0	More than 6 hours	>6hrs	4-6 hours	4-6hrs	Glasses	1	0	1	0	0	0	Sitting	4 - 6 hours	Distance	No	No	No	No	No	No	No	Breaks		More than a year ago
2021-03-09 15:29:11	12-13	Female	Yes	Indo-Trinidad	Urban area	5 years & above	6	Form 2	4	Yes	Laptop/Macbook	0	1	0	4-6 hours	4-6hrs	4-6 hours	4-6hrs	Neither glasses nor contact lenses	0	-1	1	0	0	0	Sitting	More than 6 hours	Distance	No	Yes	No	Yes	Yes	No	No	Breaks		Never had an eye exam
2021-03-08 21:57:10	12-13	Male	Yes	Afro-Trinidadian	Rural area	5 years & above	4	Form 2	5	Yes	Desktop	0	1	0	1-2 hours	<2hrs	4-6 hours	4-6hrs	Glasses	1	1	1	0	0	0	Sitting	2 - 4 hours	Distance	No	Yes	Yes	Yes	Yes	Yes	No	Breaks		More than 2 years ago
2021-03-20 20:04:33	12-13	Female	Yes	Indo-Trinidad	Urban area	5 years & above	3	Form 2	5	Yes	Tablet/iPad	1	0	0	Not a fixed amount of time everyday , mostly 1/2 an hour-2 hours	<2hrs	1/2 an hour-2 hours	<2hrs	Glasses	1	1	1	0	0	0	Sitting	More than 6 hours	Distance	No	No	No	No	No	No	No	Breaks		More than 2 years ago
2021-03-22 10:37:50	12-13	Female	Yes	Mixed	Urban area	5 years & above	7	Form 2	6	Yes	Laptop/Macbook	0	1	0	2-4 hours	2-4hrs	10	>6hrs	Glasses	1	-1	0	1	0	0	Laying down	2 - 4 hours	Near	No	No	No	No	No	No	No	Breaks		Never had any since I had no eye problems as my mother said to me
2021-03-16 19:18:18	14-15	Female	Yes	Indo-Trinidad	Urban area	5 years & above	5	Form 2	6	Yes	Laptop/Macbook	0	1	0	Less than an hour	<2hrs	4-6 hours	4-6hrs	Glasses	1	1	1	0	0	0	Sitting	Less than 1 hour	I see well both near and distance	No	No	Yes	Yes	Yes	Yes	No	Breaks		More than 2 years ago
2021-03-02 13:21:18	14-15	Male	Yes	Indo-Trinidad	Urban area	5 years & above	6	Form 2	6	Yes	Phone	0	0	1	4-6 hours	4-6hrs	Less than an hour	<2hrs	Glasses	1	1	1	0	0	0	Sitting	2 - 4 hours	Distance	No	No	No	No	No	No	No	Breaks		More than 2 years ago
2021-03-19 13:19:54	18-19	Female	Yes	Indo-Trinidad	Rural area	5 years & above	1	Form 2	7	Yes	Laptop/Macbook	0	1	0	Less than an hour	<2hrs	4-6 hours	4-6hrs	Neither glasses nor contact lenses	0	0	1	0	0	0	Sitting	4 - 6 hours	I see well both near and distance	No	No	No	No	No	No	No	Breaks		More than a year ago
2021-03-08 18:12:33	12-13	Male	Yes	Afro-Trinidadian	Urban area	5 years & above	7	Form 2	7	Yes	Tablet/iPad	1	0	0	None		4-6 hours	4-6hrs	Neither glasses nor contact lenses	0	-1	1	1	0	1	Sitting, Laying down	4 - 6 hours	Distance	No	Yes	Yes	Yes	Yes	Yes	No	Breaks		3 years ago
2021-03-08 16:20:18	14-15	Female	Yes	Indo-Trinidad	Rural area	5 years & above	1	Form 2	7	Yes	Phone	0	0	1	4-6 hours	4-6hrs	4-6 hours	4-6hrs	Glasses	1	1	0	1	0	0	Laying down	Less than 1 hour	Near	No	Yes	Yes	No	Yes	No	No	Breaks		More than a year ago
2021-03-23 11:43:20	14-15	Male	Yes	Afro-Trinidadian	Rural area	5 years & above	2	Form 3	1	Yes	Phone	0	0	1	1-2 hours	<2hrs	24/7 now	>6hrs	Glasses	1	1	0	1	0	0	Laying down	More than 6 hours	Distance	No	No	No	No	No	No	No	Breaks		More than a year ago
2021-03-16 14:20:14	14-15	Female	Yes	Other	Rural area	5 years & above	5	Form 3	1	Yes	Laptop/Macbook	0	1	0	1-2 hours	<2hrs	7-9 hours	>6hrs	Glasses	1	1	1	0	0	0	Sitting	1 - 2 hours	Distance	No	No	No	No	No	No	No	Breaks		More than a year ago
2021-03-16 14:07:55	14-15	Female	Yes	Indo-Trinidad	Urban area	5 years & above	2	Form 3	1	Yes	Desktop	0	1	0	1-2 hours	<2hrs	4-6 hours	4-6hrs	Glasses	1	1	1	0	0	0	Sitting	4 - 6 hours	I see well both near and distance	No	Yes	Yes	No	Yes	Yes	No	Breaks		More than 2 years ago
2021-03-02 23:11:07	14-15	Female	Yes	Mixed	Urban area	5 years & above	5	Form 3	1	Yes	Laptop/Macbook	0	1	0	More than 6 hours	>6hrs	8hours	>6hrs	Contact Lenses	1	1	1	0	0	0	Sitting	More than 6 hours	Distance	No	No	Yes	Yes	No	No	No	Breaks		Never had an eye exam
2021-03-24 09:28:07	14-15	Male	Yes	Indo-Trinidad	Urban area	5 years & above	5	Form 3	1	Yes	Laptop/Macbook	0	1	0	2-4 hours	2-4hrs	1-2 hours	<2hrs	Glasses	1	0	1	0	0	0	Sitting	1 - 2 hours	Distance	No	No	No	No	No	No	No	Breaks		More than 2 years ago
2021-03-24 16:42:39	16-17	Male	Yes	Indo-Trinidad	Rural area	5 years & above	1	Form 3	2	Yes	Phone	0	0	1	2-4 hours	2-4hrs	4-6 hours	4-6hrs	Glasses	1	1	1	0	0	0	Sitting	2 - 4 hours	Distance	No	No	No	No	No	No	No	Breaks		More than 2 years ago
2021-03-09 12:40:33	14-15	Female	Yes	Mixed	Rural area	5 years & above	3	Form 3	2	Yes	Laptop/Macbook	0	1	0	2-4 hours	2-4hrs	4-6 hours	4-6hrs	Glasses	1	1	1	1	0	1	Sitting, Laying down	1 - 2 hours	I see well both near and distance	No	Yes	Yes	Yes	Yes	No	No	Breaks		More than 2 years ago
2021-03-16 14:13:31	16-17	Female	Yes	Mixed	Rural area	5 years & above	7	Form 3	2	Yes	Laptop/Macbook	0	1	0	2-4 hours	2-4hrs	4-6 hours	4-6hrs	Glasses	1	1	1	0	0	0	Sitting	4 - 6 hours	Distance	No	No	No	No	No	No	No	Breaks		Never had an eye exam
2021-02-28 14:32:54	12-13	Male	Yes	Mixed	Rural area	5 years & above	6	Form 3	3	Yes	Phone	0	0	1	More than 6 hours	>6hrs	4-6 hours	4-6hrs	Glasses	1	1	0	1	0	0	Laying down	More than 6 hours	Distance	No	Yes	Yes	Yes	No	No	No	Breaks		Never had an eye exam
2021-03-15 23:41:20	14-15	Female	Yes	Indo-Trinidad	Rural area	5 years & above	6	Form 3	3	Yes	Laptop/Macbook	0	1	0	4-6 hours	4-6hrs	more than 8 hours	>6hrs	Glasses	1	1	1	0	0	0	Sitting	More than 6 hours	I see well both near and distance	No	No	Yes	No	Yes	Yes	No	Breaks		Within the last 6 months
2021-03-24 09:28:02	14-15	Male	Yes	Other	Rural area	5 years & above	6	Form 3	3	Yes	Phone	0	0	1	More than 6 hours	>6hrs	4-6 hours	4-6hrs	Glasses	1	1	1	0	0	0	Sitting	4 - 6 hours	Distance	No	Yes	Yes	Yes	No	No	No	Breaks		More than a year ago
2021-03-16 14:11:17	14-15	Female	Yes	Mixed	Urban area	5 years & above	5	Form 3	3	Yes	Tablet/iPad	1	0	0	2-4 hours	2-4hrs	4-6 hours	4-6hrs	Glasses	1	1	1	0	0	0	Sitting	4 - 6 hours	Distance	No	No	No	No	No	No	No	Breaks		3 years ago
2021-03-23 16:26:10	14-15	Male	Yes	Indo-Trinidad	Urban area	5 years & above	5	Form 3	3	Yes	Laptop/Macbook	0	1	0	More than 6 hours	>6hrs	More than 6 hours	>6hrs	Glasses	1	1	0	1	0	0	Laying down	2 - 4 hours	Distance	Inward	No	No	No	No	No	No	Breaks		Never had an eye exam
2021-03-22 10:16:41	14-15	Male	Yes	Mixed	Urban area	5 years & above	7	Form 3	3	Yes	Laptop/Macbook	0	1	0	More than 6 hours	>6hrs	4-6 hours	4-6hrs	Glasses	1	1	1	1	0	1	Sitting, Laying down	More than 6 hours		No	No	Yes	No	Yes	Yes	No	Breaks		More than 2 years ago
2021-03-16 14:55:49	14-15	Female	Yes	Indo-Trinidad	Urban area	5 years & above	5	Form 3	3	Yes	Laptop/Macbook	0	1	0	1-2 hours	<2hrs	4-6 hours	4-6hrs	Glasses	1	1	1	0	0	0	Sitting	2 - 4 hours	I see well both near and distance	Inward	No	No	Yes	No	No	No	Breaks		Never had an eye exam
2021-03-16 14:09:55	14-15	Female	Yes	Indo-Trinidad	Urban area	5 years & above	3	Form 3	3	Yes	Phone	0	0	1	2-4 hours	2-4hrs	1-2 hours	<2hrs	Glasses	1	1	1	0	0	0	Sitting	4 - 6 hours	Distance	Inward	Yes	Yes	Yes	Yes	No	No	Breaks		More than 2 years ago
2021-03-16 19:28:42	14-15	Female	Yes	Indo-Trinidad	Urban area	5 years & above	4	Form 3	4	Yes	Tablet/iPad	1	0	0	1-2 hours	<2hrs	4-6 hours	4-6hrs	Glasses	1	1	1	0	0	0	Sitting	2 - 4 hours	Distance	No	Yes	No	No	No	No	No	Breaks		Never had an eye exam
2021-03-24 08:57:55	14-15	Male	Yes	Other	Rural area	5 years & above	6	Form 3	4	Yes	Phone	0	0	1	2-4 hours	2-4hrs	When school start I don't use it	Unspecified	Neither glasses nor contact lenses	0	-1	0	1	0	0	Laying down	More than 6 hours	Distance	Inward	No	No	No	No	No	No	Breaks		More than 2 years ago
2021-03-16 14:19:34	14-15	Female	Yes	Other	Rural area	5 years & above	4	Form 3	5	Yes	Laptop/Macbook	0	1	0	1-2 hours	<2hrs	7-9 hours	>6hrs	Glasses	1	1	1	0	0	0	Sitting	1 - 2 hours	Distance	No	Yes	No	No	Yes	No	No	Breaks		Last eye exam was when u was in standed 2
2021-03-24 10:44:29	14-15	Male	Yes	Afro-Trinidadian	Urban area	5 years & above	1	Form 3	5	Yes	Phone	0	0	1	More than 6 hours	>6hrs	2-4 hours	2-4hrs	Neither glasses nor contact lenses	0	1	1	0	0	0	Sitting	1 - 2 hours	I see well both near and distance	No	No	No	No	No	No	No	Breaks		More than 2 years ago
2021-03-22 10:14:52	14-15	Female	Yes	Mixed	Urban area	5 years & above	6	Form 3	5	Yes	Desktop	0	1	0	More than 6 hours	>6hrs	4-6 hours	4-6hrs	Glasses	1	-1	1	0	0	0	Sitting	2 - 4 hours	Distance	No	No	No	No	No	No	No	Breaks		Never had an eye exam
2021-03-05 11:17:13	16-17	Male	Yes	Mixed	Urban area	5 years & above	5	Form 3	5	Yes	Phone	0	0	1	4-6 hours	4-6hrs	4-6 hours	4-6hrs	Glasses	1	1	1	0	0	0	Sitting	1 - 2 hours	I see well both near and distance	No	No	No	No	No	No	No	Breaks		More than 2 years ago
2021-03-03 19:23:09	14-15	Male	Yes	Indo-Trinidad	Rural area	5 years & above	5	Form 3	5	Yes	Laptop/Macbook	0	1	0	4-6 hours	4-6hrs	4-6 hours	4-6hrs	Glasses	1	1	1	0	0	0	Sitting	2 - 4 hours	Distance	No	Yes	Yes	No	No	No	No	Breaks		Never had an eye exam
2021-03-22 11:04:05	14-15	Female	Yes	Indo-Trinidad	Urban area	5 years & above	4	Form 3	6	Yes	Phone	0	0	1	More than 6 hours	>6hrs	4-6 hours	4-6hrs	Glasses	1	1	1	0	0	0	Sitting	1 - 2 hours	I see well both near and distance	No	No	No	No	No	No	No	Breaks		5 years
2021-03-16 14:05:42	14-15	Female	Yes	Afro-Trinidadian	Rural area	5 years & above	7	Form 3	6	Yes	Laptop/Macbook	0	1	0	2-4 hours	2-4hrs	4-6 hours	4-6hrs	Glasses	1	1	1	0	0	0	Sitting	4 - 6 hours	Distance	No	Yes	Yes	Yes	No	No	No	Breaks		More than 2 years ago
2021-03-13 21:56:22	14-15	Female	Yes	Indo-Trinidad	Rural area	5 years & above	4	Form 3	6	Yes	Laptop/Macbook	0	1	0	4-6 hours	4-6hrs	2-4 hours	2-4hrs	Glasses	1	1	1	0	0	0	Sitting	4 - 6 hours	Distance	No	Yes	No	Yes	Yes	No	No	Breaks		5yrs ago
2021-03-24 09:38:43	14-15	Male	Yes	Mixed	Rural area	5 years & above	7	Form 3	6	Yes	Phone	0	0	1	4-6 hours	4-6hrs	4-6 hours	4-6hrs	Glasses	1	1	1	0	0	0	Sitting	4 - 6 hours	Distance	No	No	No	No	No	No	No	Breaks		More than 2 years ago
2021-03-16 14:05:47	14-15	Female	Yes	Indo-Trinidad	Rural area	5 years & above	3	Form 3	7	Yes	Desktop	0	1	0	4-6 hours	4-6hrs	4-6 hours	4-6hrs	Glasses	1	0	0	1	0	0	Laying down	Less than 1 hour	Distance	No	No	No	No	No	No	No	Breaks		More than a year ago
2021-03-17 14:34:58	14-15	Female	Yes	Indo-Trinidad	Urban area	5 years & above	1	Form 3	7	Yes	Tablet/iPad	1	0	0	1-2 hours	<2hrs	4-6 hours	4-6hrs	Glasses	1	1	1	0	0	0	Sitting	2 - 4 hours	Distance	No	Yes	Yes	No	No	No	No	Breaks		A very long while ago
2021-03-24 09:14:04	14-15	Prefer not to say	Yes	Indo-Trinidad	Rural area	5 years & above	4	Form 3	7	Yes	Tablet/iPad	1	0	0	2-4 hours	2-4hrs	2-4 hours	2-4hrs	Glasses	1	1	1	0	0	0	Sitting	1 - 2 hours	Distance	No	No	No	No	Yes	No	No	Breaks		Never had an eye exam
2021-03-24 14:53:40	14-15	Male	Yes	Indo-Trinidad	Urban area	5 years & above	3	Form 3	7	Yes	Phone	0	0	1	idk	Unspecified	4-6 hours	4-6hrs	Glasses	1	1	1	1	0	1	Sitting, Laying down	Less than 1 hour	I see well both near and distance	No	Yes	No	Yes	Yes	No	No	Breaks		Never had an eye exam
2021-03-16 14:06:57	14-15	Female	Yes	Indo-Trinidad	Urban area	5 years & above	2	Form 3	7	Yes	Phone	0	0	1	2-4 hours	2-4hrs	4-6 hours	4-6hrs	Glasses	1	1	1	0	0	0	Sitting	2 - 4 hours	Distance	No	No	No	No	No	No	No	Breaks		Never had an eye exam
2021-03-24 08:56:23	16-17	Male	Yes	Indo-Trinidad	Rural area	5 years & above	4	Form 3	7	Yes	Laptop/Macbook	0	1	0	More than 6 hours	>6hrs	1-2 hours	<2hrs	Neither glasses nor contact lenses	0	-1	1	0	0	0	Sitting	1 - 2 hours	I see well both near and distance	No	No	No	No	No	No	No	Breaks		More than 2 years ago
2021-03-05 08:59:27	14-15	Male	Yes	Mixed	Urban area	5 years & above	4	Form 4	1	Yes	Laptop/Macbook	0	1	0	i never used my laptop often	Unspecified	2-4 hours	2-4hrs	Glasses	1	1	1	1	0	1	Sitting, Laying down	2 - 4 hours	I see well both near and distance	No	No	No	No	No	No	No	Breaks		Within the last 6 months
2021-03-23 09:12:33	16-17	Male	Yes	Indo-Trinidad	Rural area	5 years & above	6	Form 4	1	Yes	Phone	0	0	1	1-2 hours	<2hrs	4-6 hours	4-6hrs	Glasses	1	1	1	0	0	0	Sitting	4 - 6 hours	Distance	No	Yes	No	No	No	No	No	Breaks		More than a year ago
2021-03-02 21:10:11	14-15	Female	Yes	Indo-Trinidad	Rural area	5 years & above	3	Form 4	1	Yes	Laptop/Macbook	0	1	0	2-4 hours	2-4hrs	4-6 hours	4-6hrs	Glasses	1	0	1	0	0	0	Sitting	2 - 4 hours	Distance	No	No	No	No	No	No	No	Breaks		More than 2 years ago
2021-03-23 09:02:40	14-15	Male	Yes	Indo-Trinidad	Urban area	5 years & above	7	Form 4	1	Yes	Laptop/Macbook	0	1	0	Less than an hour	<2hrs	4-6 hours	4-6hrs	Neither glasses nor contact lenses	0	0	1	0	0	0	Sitting	2 - 4 hours	I see well both near and distance	No	No	No	No	No	No	No	Breaks		More than a year ago
2021-03-23 09:13:29	14-15	Male	Yes	Indo-Trinidad	Rural area	5 years & above	4	Form 4	1	Yes	Laptop/Macbook	0	1	0	More than 6 hours	>6hrs	4-6 hours	4-6hrs	Glasses	1	1	1	0	0	0	Sitting	1 - 2 hours	Distance	No	Yes	No	No	No	No	No	Breaks		More than 2 years ago
2021-03-23 09:04:00	14-15	Male	Yes	Other	Urban area	5 years & above	5	Form 4	2	Yes	Phone	0	0	1	2-4 hours	2-4hrs	4-6 hours	4-6hrs	Glasses	1	1	1	1	0	1	Sitting, Laying down	2 - 4 hours	Distance	No	No	No	No	No	No	No	Breaks		More than a year ago
2021-03-23 09:05:24	16-17	Prefer not to say	Yes	Mixed	Urban area	5 years & above	3	Form 4	2	Yes	Laptop/Macbook	0	1	0	4-6 hours	4-6hrs	4-6 hours	4-6hrs	Glasses	1	1	1	0	0	0	Sitting	4 - 6 hours	Distance	No	No	Yes	Yes	No	No	Yes	Breaks		More than 2 years ago
2021-03-02 19:10:54	14-15	Male	No	Indo-Trinidad	Rural area	5 years & above	1	Form 4	3	Yes	Laptop/Macbook	0	1	0	2-4 hours	2-4hrs	7 hours	>6hrs	Glasses	1	1	1	0	0	0	Sitting	More than 6 hours	I see well both near and distance	No	No	No	No	No	No	No	Breaks		Never had an eye exam
2021-03-14 21:21:40	16-17	Female	Yes	Mixed	Urban area	5 years & above	7	Form 4	3	Yes	Phone	0	0	1	More than 6 hours	>6hrs	4-6 hours	4-6hrs	Glasses	1	1	0	1	0	0	Laying down	More than 6 hours	Distance	No	Yes	No	No	Yes	Yes	No	Breaks		More than 2 years ago
2021-03-05 08:59:35	14-15	Male	Yes	Mixed	Urban area	5 years & above	7	Form 4	3	Yes	Laptop/Macbook	0	1	0	i never used my laptop often	Unspecified	2-4 hours	2-4hrs	Glasses	1	1	1	1	0	1	Sitting, Laying down	2 - 4 hours	I see well both near and distance	No	Yes	Yes	Yes	Yes	No	No	Breaks		More than 2 years ago
2021-03-16 19:12:22	14-15	Male	Yes	Indo-Trinidad	Urban area	5 years & above	5	Form 4	4	Yes	Laptop/Macbook	0	1	0	Less than an hour	<2hrs	13 hours	>6hrs	Glasses	1	1	1	0	0	0	Sitting	Less than 1 hour	Distance	No	No	No	No	No	No	No	Breaks		More than 2 years ago
2021-03-23 09:06:07	14-15	Male	Yes	Mixed	Urban area	5 years & above	5	Form 4	4	Yes	Laptop/Macbook	0	1	0	4-6 hours	4-6hrs	8-10 hours at most	>6hrs	Glasses	1	1	1	1	0	1	Sitting, Laying down	More than 6 hours	Distance	No	Yes	Yes	No	No	No	No	Breaks		Within the last year
2021-03-27 12:20:50	14-15	Male	Yes	Other	Urban area	5 years & above	6	Form 4	5	Yes	Phone	0	0	1	2-4 hours	2-4hrs	4-6 hours	4-6hrs	Glasses	1	1	1	1	0	1	Sitting, Laying down	2 - 4 hours	Distance	No	No	No	No	No	No	No	Breaks		Within the last year
2021-03-02 19:18:10	16-17	Female	Yes	Indo-Trinidad	Urban area	5 years & above	5	Form 4	6	Yes	Tablet/iPad	1	0	0	4-6 hours	4-6hrs	10-12	>6hrs	Glasses	1	1	1	0	0	0	Sitting	2 - 4 hours	Distance	No	Yes	No	Yes	No	Yes	No	Breaks		More than 2 years ago
2021-03-13 17:29:22	14-15	Female	Yes	Afro-Trinidadian	Rural area	5 years & above	4	Form 4	7	Yes	both phone and laptop	0	1	1	2-4 hours	2-4hrs	4-6 hours	4-6hrs	Glasses	1	1	1	0	0	0	Sitting	2 - 4 hours	Near	No	No	No	No	No	No	No	Breaks		More than 2 years ago
2021-03-14 09:26:02	14-15	Female	Yes	Afro-Trinidadian	Urban area	5 years & above	5	Form 4	7	Yes	Laptop/Macbook	0	1	0	Less than an hour	<2hrs	4-6 hours	4-6hrs	Glasses	1	0	1	0	0	0	Sitting	1 - 2 hours	Distance	No	Yes	Yes	No	No	No	No	Breaks		More than 2 years ago
2021-03-05 10:13:41	16-17	Male	Yes	Other	Rural area	5 years & above	2	Form 4	7	Yes	Phone	0	0	1	2-4 hours	2-4hrs	Less than an hour	<2hrs	Glasses	1	1	1	0	0	0	Sitting	Less than 1 hour	Distance	No	Yes	Yes	No	Yes	No	No	Breaks		More than 2 years ago
2021-03-15 12:30:04	16-17	Female	Yes	Mixed	Rural area	5 years & above	7	Form 5	1	Yes	Laptop/Macbook	0	1	0	4-6 hours	4-6hrs	4-6 hours	4-6hrs	Glasses	1	1	0	1	0	0	Laying down	1 - 2 hours	Distance	No	No	Yes	No	Yes	Yes	No	Breaks		More than a year ago
2021-03-16 14:10:41	18-19	Female	No	Other	Rural area	3-4 years	6	Form 5	1	Yes	Phone	0	0	1	2-4 hours	2-4hrs	10-12 hours	>6hrs	Glasses	1	0	0	1	0	0	Laying down	2 - 4 hours	Distance	No	Yes	No	Yes	Yes	No	No	Breaks		More than 2 years ago
2021-03-08 21:09:58	16-17	Female	Yes	Indo-Trinidad	Urban area	5 years & above	5	Form 5	1	Yes	Laptop/Macbook	0	1	0	4-6 hours	4-6hrs	14-15 hours	>6hrs	Glasses	1	1	1	0	0	0	Sitting	More than 6 hours	Distance	No	Yes	No	No	No	No	No	Breaks		More than 2 years ago
2021-03-25 07:37:48	16-17	Female	Yes	Mixed	Urban area	5 years & above	3	Form 5	2	Yes	Tablet/iPad	1	0	0	2-4 hours	2-4hrs	6 -8 hours	>6hrs	Glasses	1	0	1	0	0	0	Sitting	4 - 6 hours	Distance	No	Yes	Yes	Yes	No	No	No	Breaks		More than 2 years ago
2021-03-22 10:52:59	16-17	Male	Yes	Afro-Trinidadian	Urban area	5 years & above	5	Form 5	2	Yes	Laptop/Macbook	0	1	0	2-4 hours	2-4hrs	4-6 hours	4-6hrs	Glasses	1	1	1	0	0	0	Sitting	2 - 4 hours	Distance	No	No	No	No	No	No	No	Breaks		More than a year ago
2021-03-12 01:49:02	16-17	Female	Yes	Afro-Trinidadian	Rural area	5 years & above	6	Form 5	3	Yes	Tablet/iPad	1	0	0	More than 6 hours	>6hrs	1-2 hours	<2hrs	Glasses	1	1	1	0	0	0	Sitting	1 - 2 hours	Distance	Outward	No	No	No	No	No	No	Breaks		More than 2 years ago
2021-03-02 19:54:05	16-17	Female	Yes	Indo-Trinidad	Rural area	5 years & above	2	Form 5	3	Yes	Laptop/Macbook	0	1	0	2-4 hours	2-4hrs	7-9	>6hrs	Glasses	1	1	1	1	0	1	Sitting, Laying down	4 - 6 hours	Distance	Inward	No	No	No	No	No	No	Breaks		More than 2 years ago
2021-03-06 14:36:54	16-17	Male	Yes	Indo-Trinidad	Rural area	5 years & above	5	Form 5	3	Yes	Laptop/Macbook	0	1	0	4-6 hours	4-6hrs	10	>6hrs	Glasses	1	1	1	0	0	0	Sitting	More than 6 hours	I see well both near and distance	No	No	No	No	No	No	No	Breaks		More than 2 years ago
2021-03-22 10:40:46	16-17	Female	Yes	Mixed	Urban area	5 years & above	3	Form 5	3	Yes	Tablet/iPad	1	0	0	2-4 hours	2-4hrs	4-6 hours	4-6hrs	Glasses	1	1	0	1	0	0	Laying down	2 - 4 hours	Distance	No	Yes	No	No	Yes	No	No	Breaks		More than 2 years ago
2021-03-07 16:23:51	16-17	Male	Yes	Indo-Trinidad	Rural area	5 years & above	1	Form 5	4	Yes	Laptop/Macbook	0	1	0	4-6 hours	4-6hrs	10	>6hrs	Glasses	1	1	1	0	0	0	Sitting	More than 6 hours	I see well both near and distance	No	Yes	No	No	No	No	No	Breaks		Within the last 6 months
2021-03-16 14:14:29	18-19	Female	No	Other	Urban area	3-4 years	4	Form 5	4	Yes	Laptop/Macbook	0	1	0	4-6 hours	4-6hrs	8hours	>6hrs	Glasses	1	1	1	0	1	1	Sitting, Standing	4 - 6 hours	Distance	No	No	No	No	No	No	No	Breaks		More than a year ago
2021-03-22 20:31:20	16-17	Male	Yes	Indo-Trinidad	Urban area	5 years & above	7	Form 5	4	Yes	Phone	0	0	1	2-4 hours	2-4hrs	4-6 hours	4-6hrs	Glasses	1	1	1	0	0	0	Sitting	2 - 4 hours	Distance	No	Yes	No	No	Yes	No	No	Breaks		More than 2 years ago
2021-03-02 18:52:26	16-17	Male	Yes	Indo-Trinidad	Urban area	5 years & above	3	Form 5	4	Yes	Phone	0	0	1	2-4 hours	2-4hrs	4-6 hours	4-6hrs	Glasses	1	1	1	1	0	1	Sitting, Laying down	4 - 6 hours	Distance	No	Yes	Yes	No	Yes	No	No	Breaks		More than a year ago
2021-03-04 14:34:53	16-17	Female	Yes	Indo-Trinidad	Rural area	5 years & above	3	Form 5	4	Yes	Laptop/Macbook	0	1	0	2-4 hours	2-4hrs	7-9	>6hrs	Glasses	1	1	1	1	0	1	Sitting, Laying down	4 - 6 hours	Distance	Inward	Yes	Yes	No	No	No	Yes	Breaks		More than 2 years ago
2021-03-16 14:06:51	16-17	Female	Yes	Other	Urban area	5 years & above	2	Form 5	5	Yes	Laptop/Macbook	0	1	0	4-6 hours	4-6hrs	Approximately 9 to 12 hours	>6hrs	Glasses	1	1	1	0	0	0	Sitting	1 - 2 hours	Near	No	Yes	Yes	Yes	Yes	Yes	Yes	Breaks		More than a year ago
2021-03-22 20:20:17	16-17	Male	Yes	Indo-Trinidad	Urban area	5 years & above	6	Form 5	5	Yes	Laptop/Macbook	0	1	0	2-4 hours	2-4hrs	12	>6hrs	Glasses	1	0	1	0	0	0	Sitting	1 - 2 hours	Distance	No	Yes	No	No	No	No	No	Breaks		More than 2 years ago
2021-03-03 15:54:28	16-17	Female	No	Indo-Trinidad	Urban area	5 years & above	4	Form 5	6	Yes	Laptop/Macbook	0	1	0	2-4 hours	2-4hrs	4-6 hours	4-6hrs	Glasses	1	1	1	0	0	0	Sitting	2 - 4 hours	Distance	No	No	Yes	Yes	Yes	No	No	Breaks		More than 2 years ago
2021-03-06 08:43:38	16-17	Male	Yes	Other	Urban area	5 years & above	5	Form 5	6	Yes	Desktop	0	1	0	More than 6 hours	>6hrs	4-6 hours	4-6hrs	Glasses	1	0	0	0	1	0	Standing	More than 6 hours	Distance	No	Yes	Yes	No	No	No	No	Breaks		More than 2 years ago
2021-03-22 11:03:00	16-17	Female	Yes	Mixed	Urban area	5 years & above	2	Form 5	6	Yes	Phone	0	0	1	4-6 hours	4-6hrs	9-12 hours	>6hrs	Glasses	1	1	1	1	0	1	Sitting, Laying down	2 - 4 hours	Distance	No	No	Yes	Yes	No	No	No	Breaks		More than 2 years ago
2021-03-23 16:09:47	18-19	Male	Yes	Indo-Trinidad	Urban area	5 years & above	7	Form 5	6	Yes	I used both Desktop and Phone	0	1	1	2-4 hours	2-4hrs	4-6 hours	4-6hrs	Glasses	1	1	1	0	0	0	Sitting	2 - 4 hours	Distance	No	Yes	Yes	No	Yes	Yes	No	Breaks		More than 2 years ago
2021-03-22 11:53:54	18-19	Female	Yes	Mixed	Urban area	5 years & above	3	Form 5	7	Yes	Phone	0	0	1	2-4 hours	2-4hrs	4-6 hours	4-6hrs	Glasses	1	1	1	0	0	0	Sitting	4 - 6 hours	Distance	No	Yes	Yes	Yes	Yes	Yes	No	Breaks		More than a year ago
2021-03-03 14:40:50	16-17	Female	No	Indo-Trinidad	Urban area	5 years & above	1	Form 5	7	Yes	Laptop/Macbook	0	1	0	2-4 hours	2-4hrs	4-6 hours	4-6hrs	Glasses	1	1	1	0	0	0	Sitting	2 - 4 hours	Distance	No	Yes	Yes	Yes	Yes	No	No	Breaks		More than a year ago
2021-03-02 17:44:23	16-17	Male	Yes	Indo-Trinidad	Rural area	5 years & above	7	Form 5	7	Yes	Laptop/Macbook	0	1	0	More than 6 hours	>6hrs	8 to 10 hours	>6hrs	Glasses	1	-1	1	0	0	0	Sitting	1 - 2 hours	I see well both near and distance	No	Yes	Yes	Yes	Yes	Yes	No	Breaks		More than a year ago
2021-03-19 11:14:22	16-17	Female	Yes	Indo-Trinidad	Rural area	5 years & above	2	Form 5	7	Yes	Laptop/Macbook	0	1	0	2-4 hours	2-4hrs	4-6 hours	4-6hrs	Glasses	1	1	1	0	0	0	Sitting	More than 6 hours	Near	No	No	No	No	No	No	No	Breaks		More than 2 years ago
2021-03-04 00:52:01	18-19	Male	Yes	Indo-Trinidad	Rural area	5 years & above	7	Form 6	1	Yes	Tablet/iPad	1	0	0	2-4 hours	2-4hrs	4-6 hours	4-6hrs	Glasses	1	0	0	1	0	0	Laying down	2 - 4 hours	Distance	No	Yes	No	No	No	No	No	Breaks		More than 2 years ago
2021-03-17 11:01:25	18-19	Female	Yes	Mixed	Urban area	5 years & above	7	Form 6	1	Yes	Laptop/Macbook	0	1	0	4-6 hours	4-6hrs	10-12 hours	>6hrs	Glasses	1	1	1	0	0	0	Sitting	Less than 1 hour	I see well both near and distance	No	Yes	Yes	Yes	Yes	Yes	No	Breaks		More than a year ago
2021-03-23 14:50:34	18-19	Female	Yes	Indo-Trinidad	Urban area	5 years & above	4	Form 6	1	Yes	Laptop/Macbook	0	1	0	1-2 hours	<2hrs	4-6 hours	4-6hrs	Glasses	1	1	1	0	0	0	Sitting	1 - 2 hours	Distance	No	No	No	No	Yes	No	No	Breaks		Never had an eye exam
2021-03-02 19:06:37	18-19	Female	Yes	Mixed	Urban area	5 years & above	1	Form 6	2	Yes	Laptop/Macbook	0	1	0	4-6 hours	4-6hrs	4-6 hours	4-6hrs	Glasses	1	1	1	1	0	1	Sitting, Laying down	Less than 1 hour	Distance	No	No	Yes	Yes	Yes	No	No	Breaks		More than 2 years ago
2021-03-03 00:50:39	18-19	Male	Yes	Indo-Trinidad	Rural area	5 years & above	1	Form 6	2	Yes	Tablet/iPad	1	0	0	2-4 hours	2-4hrs	4-6 hours	4-6hrs	Glasses	1	0	0	1	0	0	Laying down	2 - 4 hours	Distance	No	Yes	Yes	Yes	Yes	No	No	Breaks		More than a year ago
2021-03-02 22:05:02	18-19	Male	Yes	Indo-Trinidad	Rural area	5 years & above	1	Form 6	2	Yes	Tablet/iPad	1	0	0	2-4 hours	2-4hrs	4-6 hours	4-6hrs	Glasses	1	0	0	1	0	0	Laying down	2 - 4 hours	Distance	No	Yes	No	No	Yes	No	No	Breaks		More than 2 years ago
2021-03-03 20:22:07	18-19	Male	Yes	Indo-Trinidad	Rural area	5 years & above	7	Form 6	2	Yes	Tablet/iPad	1	0	0	2-4 hours	2-4hrs	4-6 hours	4-6hrs	Glasses	1	0	0	1	0	0	Laying down	2 - 4 hours	Distance	No	No	No	No	No	No	No	Breaks		More than 2 years ago
2021-03-03 00:00:48	16-17	Male	Yes	Indo-Trinidad	Urban area	5 years & above	4	Form 6	2	Yes	Laptop/Macbook	0	1	0	1-2 hours	<2hrs	4-6 hours	4-6hrs	Both contact lenses and spectacles	1	1	1	0	0	0	Sitting	4 - 6 hours	Distance	No	Yes	No	No	No	No	No	Breaks		More than a year ago
2021-03-03 17:06:21	18-19	Male	Yes	Indo-Trinidad	Rural area	5 years & above	7	Form 6	3	Yes	Tablet/iPad	1	0	0	2-4 hours	2-4hrs	4-6 hours	4-6hrs	Glasses	1	0	0	1	0	0	Laying down	2 - 4 hours	Distance	No	No	No	No	No	No	No	Breaks		More than a year ago
2021-03-16 21:33:52	18-19	Female	Yes	Mixed	Urban area	5 years & above	3	Form 6	3	Yes	Laptop/Macbook	0	1	0	4-6 hours	4-6hrs	10-12 hours	>6hrs	Glasses	1	1	1	0	0	0	Sitting	Less than 1 hour	I see well both near and distance	No	No	No	No	No	No	No	Breaks		More than 2 years ago
2021-03-02 20:02:47	18-19	Male	Yes	Indo-Trinidad	Rural area	5 years & above	1	Form 6	3	Yes	Tablet/iPad	1	0	0	2-4 hours	2-4hrs	4-6 hours	4-6hrs	Glasses	1	0	0	1	0	0	Laying down	2 - 4 hours	Distance	No	Yes	No	Yes	Yes	No	No	Breaks		More than 2 years ago
2021-03-03 18:45:54	18-19	Male	Yes	Indo-Trinidad	Urban area	5 years & above	1	Form 6	3	Yes	Laptop/Macbook	0	1	0	2-4 hours	2-4hrs	4-6 hours	4-6hrs	Glasses	1	1	1	0	0	0	Sitting	2 - 4 hours	Distance	No	Yes	Yes	Yes	Yes	No	No	Breaks		More than 2 years ago
2021-03-02 19:20:51	18-19	Female	Yes	Mixed	Urban area	5 years & above	4	Form 6	3	Yes	Laptop/Macbook	0	1	0	2-4 hours	2-4hrs	4-6 hours	4-6hrs	Neither glasses nor contact lenses	0	-1	1	0	0	0	Sitting	4 - 6 hours	Distance	No	Yes	No	No	Yes	No	No	Breaks		Within the last 6 months
2021-03-02 18:40:51	16-17	Male	Yes	Indo-Trinidad	Urban area	5 years & above	2	Form 6	3	Yes	Laptop/Macbook	0	1	0	2-4 hours	2-4hrs	4-6 hours	4-6hrs	Glasses	1	1	1	0	0	0	Sitting	2 - 4 hours	Distance	No	Yes	Yes	No	No	No	No	Breaks		More than 2 years ago
2021-03-09 12:02:04	18-19	Female	Yes	Indo-Trinidad	Rural area	5 years & above	3	Form 6	4	Yes	Laptop/Macbook	0	1	0	2-4 hours	2-4hrs	4-6 hours	4-6hrs	Neither glasses nor contact lenses	0	-1	1	0	0	0	Sitting	1 - 2 hours	I see well both near and distance	No	Yes	No	No	Yes	No	No	Breaks		More than 2 years ago
2021-03-04 13:43:52	18-19	Male	Yes	Indo-Trinidad	Rural area	5 years & above	5	Form 6	6	Yes	Tablet/iPad	1	0	0	2-4 hours	2-4hrs	4-6 hours	4-6hrs	Glasses	1	0	0	1	0	0	Laying down	2 - 4 hours	Distance	No	Yes	Yes	Yes	Yes	Yes	No	Breaks		More than 2 years ago
2021-03-22 12:50:23	16-17	Female	Yes	Indo-Trinidad	Urban area	5 years & above	5	Form 6	6	Yes	Laptop/Macbook	0	1	0	2-4 hours	2-4hrs	8+ hours	>6hrs	Neither glasses nor contact lenses	0	0	1	0	0	0	Sitting	2 - 4 hours	I see well both near and distance	No	No	Yes	No	No	No	No	Breaks		More than 2 years ago
2021-03-03 08:35:43	18-19	Female	Yes	Mixed	Urban area	5 years & above	2	Form 6	6	Yes	Laptop/Macbook	0	1	0	4-6 hours	4-6hrs	4-6 hours	4-6hrs	Glasses	1	1	1	1	0	1	Sitting, Laying down	Less than 1 hour	Distance	No	No	Yes	No	No	No	No	Breaks		Within the last 6 months
2021-03-02 18:51:20	18-19	Female	Yes	Mixed	Rural area	5 years & above	5	Form 6	6	Yes	Laptop/Macbook	0	1	0	4-6 hours	4-6hrs	4-6 hours	4-6hrs	Glasses	1	0	0	1	0	0	Laying down	2 - 4 hours	Distance	No	Yes	No	No	Yes	Yes	No	Breaks		More than 2 years ago
2021-03-16 23:40:07	16-17	Male	Yes	Indo-Trinidad	Rural area	5 years & above	2	Form 6	6	Yes	Laptop/Macbook	0	1	0	2-4 hours	2-4hrs	4-6 hours	4-6hrs	Both contact lenses and spectacles	1	0	1	0	0	0	Sitting	1 - 2 hours	I see well both near and distance	No	Yes	Yes	Yes	Yes	Yes	No	Breaks		More than 2 years ago
2021-03-02 21:32:45	16-17	Male	Yes	Indo-Trinidad	Urban area	5 years & above	2	Form 6	6	Yes	Laptop/Macbook	0	1	0	1-2 hours	<2hrs	4-6 hours	4-6hrs	Both contact lenses and spectacles	1	1	1	0	0	0	Sitting	4 - 6 hours	Distance	No	Yes	No	Yes	Yes	No	No	Breaks		More than 2 years ago
2021-03-12 11:16:35	16-17	Female	Yes	Indo-Trinidad	Rural area	5 years & above	1	Form 6	6	Yes	Laptop/Macbook	0	1	0	4-6 hours	4-6hrs	approx. 13 hours	>6hrs	Glasses	1	1	1	0	0	0	Sitting	More than 6 hours	Distance	No	Yes	Yes	Yes	Yes	No	No	Breaks		More than 2 years ago
2021-03-02 20:24:27	18-19	Male	Yes	Mixed	Urban area	5 years & above	5	Form 6	7	Yes	Laptop/Macbook	0	1	0	More than 6 hours	>6hrs	4-6 hours	4-6hrs	Both contact lenses and spectacles	1	1	1	0	0	0	Sitting	More than 6 hours	Near	No	No	No	No	No	No	No	Breaks		Within the last 6 months
2021-03-02 20:23:20	18-19	Male	Yes	Other	Urban area	5 years & above	6	Form 6	7	Yes	Phone	0	0	1	1-2 hours	<2hrs	7-8	>6hrs	Glasses	1	1	1	0	0	0	Sitting	More than 6 hours	Distance	No	No	No	Yes	No	No	No	Breaks		More than a year ago
2021-03-16 21:26:36	18-19	Female	Yes	Indo-Trinidad	Urban area	5 years & above	3	Form 6	7	Yes	Laptop/Macbook	0	1	0	12 hours	<2hrs	18 hours	>6hrs	Glasses	1	1	1	1	0	1	Sitting, Laying down	Less than 1 hour	Distance	No	Yes	Yes	Yes	Yes	Yes	No	Breaks		More than 2 years ago
2021-03-08 19:13:25	12-13	Female	Yes	Indo-Trinidad	Urban area	5 years & above	5	Form 1	7	Yes	Laptop/Macbook	0	1	0	1-2 hours	<2hrs	4-6 hours	4-6hrs	Neither glasses nor contact lenses	0	-1	1	0	0	0	Sitting	4 - 6 hours	I see well both near and distance	No	Yes	Yes	Yes	Yes	Yes	Yes	Breaks / Self medication	Dry eyes	Within the last year	Eye drops	Medication
2021-03-20 16:01:58	12-13	Female	Yes	Mixed	Rural area	5 years & above	4	Form 1	2	Yes	Tablet/iPad	1	0	0	2-4 hours	2-4hrs	4-6 hours	4-6hrs	Neither glasses nor contact lenses	0	-1	1	0	0	0	Sitting	2 - 4 hours	I see well both near and distance	No	No	No	No	No	No	No	Breaks / Self medication		4 years ago	Vision Therapy	VT
2021-03-24 09:06:06	14-15	Female	Yes	Indo-Trinidad	Rural area	5 years & above	2	Form 3	7	Yes	Desktop	0	1	0	More than 6 hours	>6hrs	Less than an hour	<2hrs	Glasses	1	1	0	0	0	0	Other	More than 6 hours	I see well both near and distance	No	Yes	No	No	Yes	No	No	Breaks / Self medication		Within the last 6 months	Glasses	Spectacles
2021-03-24 09:49:26	14-15	Male	Yes	Other	Rural area	5 years & above	3	Form 3	4	Yes	Laptop/Macbook	0	1	0	4-6 hours	4-6hrs	4-6 hours	4-6hrs	Neither glasses nor contact lenses	0	-1	1	0	0	0	Sitting	1 - 2 hours	I see well both near and distance	No	No	Yes	No	No	No	No	Breaks / Self medication		Within the last year	Glasses	Spectacles
2021-03-22 10:12:08	14-15	Female	Yes	Afro-Trinidadian	Urban area	5 years & above	5	Form 3	4	Yes	Phone	0	0	1	More than 6 hours	>6hrs	4-6 hours	4-6hrs	Neither glasses nor contact lenses	0	-1	0	1	0	0	Laying down	2 - 4 hours	I see well both near and distance	No	No	Yes	Yes	No	No	No	Breaks / Self medication		More than a year ago	Glasses	Spectacles
2021-03-08 16:51:21	14-15	Female	Yes	Mixed	Urban area	5 years & above	1	Form 2	5	Yes	Phone	0	0	1	4-6 hours	4-6hrs	4-6 hours	4-6hrs	Neither glasses nor contact lenses	0	-1	1	0	0	0	Sitting	4 - 6 hours	I see well both near and distance	No	Yes	No	No	No	No	No	Breaks / Self-medicaffectedion		More than 2 years ago
2021-03-23 09:46:41	14-15	Male	Yes	Indo-Trinidad	Urban area	5 years & above	2	Form 3	3	Yes	Laptop/Macbook	0	1	0	More than 6 hours	>6hrs	2-4 hours	2-4hrs	Neither glasses nor contact lenses	0	-1	1	0	0	0	Sitting	1 - 2 hours	I see well both near and distance	No	Yes	Yes	Yes	Yes	No	No	Breaks / Self-medicaion		Within the last 6 months	Glasses	Spectacles
2021-03-25 13:37:30	12-13	Female	Yes	Indo-Trinidad	Urban area	5 years & above	3	Form 1	1	Yes	Laptop/Macbook	0	1	0	1-2 hours	<2hrs	4-6 hours	4-6hrs	Neither glasses nor contact lenses	0	-1	1	0	0	0	Sitting	4 - 6 hours	I see well both near and distance	No	No	No	No	No	No	No	Breaks / Self-medicasion		Within the last year
2021-03-25 14:03:09	12-13	Female	Yes	Indo-Trinidad	Urban area	5 years & above	7	Form 1	3	Yes	Laptop/Macbook	0	1	0	More than 6 hours	>6hrs	4-6 hours	4-6hrs	Neither glasses nor contact lenses	0	-1	1	0	0	0	Sitting	1 - 2 hours	I see well both near and distance	No	Yes	No	No	No	No	Yes	Breaks / Self-medication	Sleep, or take paracetamol	More than 2 years ago	None	None
2021-03-15 12:15:23	12-13	Female	Yes	Mixed	Rural area	5 years & above	3	Form 1	7	Yes	Tablet/iPad	1	0	0	More than 6 hours	>6hrs	4-6 hours	4-6hrs	Neither glasses nor contact lenses	0	-1	1	0	0	0	Sitting	2 - 4 hours	I see well both near and distance	No	Yes	No	Yes	No	No	Yes	Breaks / Self-medication	Sleep	8 years ago
2021-02-26 19:19:21	12-13	Male	Yes	Indo-Trinidad	Urban area	5 years & above	7	Form 1	7	Yes	Desktop	0	1	0	4-6 hours	4-6hrs	4-6 hours	4-6hrs	Neither glasses nor contact lenses	0	-1	1	0	0	0	Sitting	2 - 4 hours	I see well both near and distance	No	Yes	Yes	No	No	No	Yes	Breaks / Self-medication	Panadol, sleep, increase in eating carrots and pumpkin, putting my face in the early morning sun, trying to not look at the screen only when necessary.	in 2013
2021-03-08 20:38:34	12-13	Female	Yes	Afro-Trinidadian	Urban area	5 years & above	6	Form 2	4	Yes	Laptop/Macbook	0	1	0	2-4 hours	2-4hrs	4-6 hours	4-6hrs	Neither glasses nor contact lenses	0	0	1	0	0	0	Sitting	2 - 4 hours	I see well both near and distance	No	No	No	No	No	No	Yes	Breaks / Self-medication	I take Panadol and sleep for headachs	More than 2 years ago
2021-03-24 09:09:01	14-15	Male	Yes	Indo-Trinidad	Rural area	5 years & above	6	Form 3	3	Yes	Tablet/iPad	1	0	0	Less than an hour	<2hrs	4-6 hours	4-6hrs	Neither glasses nor contact lenses	0	-1	1	0	0	0	Sitting	4 - 6 hours	I see well both near and distance	No	Yes	Yes	Yes	Yes	No	Yes	Breaks / Self-medication	Eye drops and More sleep	More than a year ago	Glasses	Spectacles
2021-03-24 10:38:59	14-15	Male	Yes	Indo-Trinidad	Rural area	5 years & above	5	Form 3	7	Yes	Phone	0	0	1	2-4 hours	2-4hrs	2-4 hours	2-4hrs	Neither glasses nor contact lenses	0	-1	0	0	1	0	Standing	2 - 4 hours	I see well both near and distance	No	No	No	No	No	No	No	Breaks / Self-medicduringion		Within the last year	Glasses	Spectacles
2021-03-23 09:08:43	14-15	Male	Yes	Other	Rural area	5 years & above	2	Form 4	3	Yes	Laptop/Macbook	0	1	0	More than 6 hours	>6hrs	4-6 hours	4-6hrs	Neither glasses nor contact lenses	0	-1	0	1	0	0	Laying down	More than 6 hours	Distance	No	Yes	Yes	Yes	No	No	No	Breaks / Self-medicforion		More than 2 years ago	Checkup	No treatment
2021-03-14 06:59:49	14-15	Male	Yes	Afro-Trinidadian	Urban area	5 years & above	2	Form 4	5	Yes	Phone	0	0	1	4-6 hours	4-6hrs	2-4 hours	2-4hrs	Neither glasses nor contact lenses	0	-1	1	0	0	0	Sitting	1 - 2 hours	I see well both near and distance	No	Yes	Yes	Yes	No	No	No	Breaks / Self-medicharderion		More than 2 years ago
2021-03-05 08:44:16	14-15	Male	Yes	Indo-Trinidad	Rural area	5 years & above	6	Form 4	4	Yes	Phone	0	0	1	Less than an hour	<2hrs	2-4 hours	2-4hrs	Neither glasses nor contact lenses	0	-1	1	0	0	0	Sitting	2 - 4 hours	I see well both near and distance	No	No	Yes	No	No	No	No	Breaks / Self-medichaveion		More than 2 years ago
2021-03-02 18:53:49	18-19	Male	Yes	Mixed	Urban area	5 years & above	1	Form 6	4	Yes	Laptop/Macbook	0	1	0	4-6 hours	4-6hrs	4-6 hours	4-6hrs	Neither glasses nor contact lenses	0	-1	1	1	0	1	Sitting, Laying down	4 - 6 hours	I see well both near and distance	No	No	No	No	Yes	No	No	Breaks / Self-mediclittleion		Didn't go in a long time
2021-03-08 22:36:03	14-15	Female	Yes	Afro-Trinidadian	Urban area	5 years & above	2	Form 2	7	Yes	Phone	0	0	1	More than 6 hours	>6hrs	4-6 hours	4-6hrs	Neither glasses nor contact lenses	0	-1	1	1	0	1	Sitting, Laying down	More than 6 hours	Distance	Outward	Yes	No	No	No	No	No	Breaks / Self-medicmayion		Within the last year	Glasses	Spectacles
2021-03-09 20:48:19	12-13	Male	Yes	Afro-Trinidadian	Rural area	5 years & above	6	Form 2	1	Yes	Laptop/Macbook	0	1	0	More than 6 hours	>6hrs	4-6 hours	4-6hrs	Neither glasses nor contact lenses	0	-1	1	0	0	0	Sitting	4 - 6 hours	I see well both near and distance	No	No	No	No	No	No	No	Breaks / Self-medicmyion		Never had an eye exam
2021-03-08 17:52:08	12-13	Female	Yes	Afro-Trinidadian	Urban area	5 years & above	1	Form 2	1	Yes	Tablet/iPad	1	0	0	More than 6 hours	>6hrs	4-6 hours	4-6hrs	Neither glasses nor contact lenses	0	-1	1	0	0	0	Sitting	2 - 4 hours	Distance	No	No	No	No	No	No	No	Breaks / Self-medicmyion		Never had an eye exam
2021-03-09 16:11:01	12-13	Female	Yes	Indo-Trinidad	Urban area	5 years & above	7	Form 2	5	Yes	Laptop/Macbook	0	1	0	2-4 hours	2-4hrs	2-4 hours	2-4hrs	Neither glasses nor contact lenses	0	-1	1	1	0	1	Sitting, Laying down	1 - 2 hours	I see well both near and distance	No	Yes	No	No	Yes	No	No	Breaks / Self-medicofion		Never had an eye exam
2021-03-02 12:20:29	12-13	Male	Yes	Indo-Trinidad	Rural area	5 years & above	7	Form 2	5	Yes	Phone	0	0	1	2-4 hours	2-4hrs	4-6 hours	4-6hrs	Neither glasses nor contact lenses	0	-1	1	0	0	0	Sitting	2 - 4 hours	I see well both near and distance	No	Yes	Yes	Yes	Yes	No	No	Breaks / Self-medicwasion		More than a year ago	Glasses	Spectacles
2021-03-03 12:20:27	14-15	Male	Yes	Indo-Trinidad	Urban area	5 years & above	5	Form 2	7	Yes	Desktop	0	1	0	1-2 hours	<2hrs	4-6 hours	4-6hrs	Neither glasses nor contact lenses	0	-1	1	0	0	0	Sitting	4 - 6 hours	I see well both near and distance	No	Yes	No	No	No	No	No	Breaks / Self-medicwearingion		More than 2 years ago	Glasses	Spectacles
2021-03-24 09:03:18	14-15	Male	Yes	Indo-Trinidad	Urban area	5 years & above	5	Form 3	7	Yes	Desktop	0	1	0	More than 6 hours	>6hrs	12 hours	>6hrs	Neither glasses nor contact lenses	0	-1	1	0	0	0	Sitting	4 - 6 hours	I see well both near and distance	No	Yes	No	No	No	No	Yes	Breaks/Self medication	rest my eyes for a little, take a little nap after school, dropped a recommended liquid drop in the eye from a pharmacist	Within the last 6 months	Glasses	Spectacles
2021-03-24 17:56:50	14-15	Female	Yes	Afro-Trinidadian	Urban area	5 years & above	6	Form 3	7	Yes	Phone	0	0	1	4-6 hours	4-6hrs	Less than an hour	<2hrs	Neither glasses nor contact lenses	0	-1	0	1	0	0	Laying down	Less than 1 hour	I see well both near and distance	No	Yes	No	No	No	No	Yes	Drank water	drink water	Within the last year	Glasses	Spectacles
2021-03-17 13:14:05	16-17	Male	Yes	Afro-Trinidadian	Urban area	5 years & above	7	Form 4	3	Yes	Phone	0	0	1	More than 6 hours	>6hrs	2-4 hours	2-4hrs	Neither glasses nor contact lenses	0	-1	0	1	0	0	Laying down	4 - 6 hours	I see well both near and distance	No	No	No	No	No	No	Yes	Drank water	Drink more water	More than a year ago
2021-02-28 13:45:55	14-15	Male	Yes	Indo-Trinidad	Rural area	5 years & above	4	Form 4	5	Yes	Phone	0	0	1	2-4 hours	2-4hrs	4-6 hours	4-6hrs	Neither glasses nor contact lenses	0	-1	1	0	0	0	Sitting	4 - 6 hours	I see well both near and distance	Inward	Yes	No	Yes	Yes	No	Yes	Drank water / increase fan speed	I tried resolving these issues by: 1. Setting my fan speed higher 2. Drinking more water 3. Eating on time 4. Turning on Night Light mode on my laptop. 5. Closing my eyes for a 5 minutes. I would say numbers 2, 4 and 5 has definitely helped but sometimes these will not work. It really depends on how bad my symptoms are.	More than a year ago
2021-03-02 19:35:04	16-17	Male	Yes	Indo-Trinidad	Urban area	5 years & above	2	Form 5	1	Yes	Laptop/Macbook	0	1	0	1-2 hours	<2hrs	10-12	>6hrs	Neither glasses nor contact lenses	0	-1	1	0	0	0	Sitting	More than 6 hours	I see well both near and distance	No	Yes	Yes	Yes	Yes	No	Yes	ECP	Visited the optician Lessened the amount of time spent on a device	Within the last 6 months	Glasses	Spectacles
2021-03-02 19:28:00	16-17	Male	Yes	Indo-Trinidad	Rural area	5 years & above	2	Form 5	1	Yes	Laptop/Macbook	0	1	0	2-4 hours	2-4hrs	6-8 hours	>6hrs	Glasses	1	0	1	0	0	0	Sitting	4 - 6 hours	Distance	No	No	No	No	No	No	Yes	ECP	Visit the optometrist	More than 2 years ago	Glasses	Spectacles
2021-03-22 10:49:50	16-17	Male	Yes	Afro-Trinidadian	Urban area	5 years & above	2	Form 5	5	Yes	Phone	0	0	1	More than 6 hours	>6hrs	4-6 hours	4-6hrs	Glasses	1	1	1	0	0	0	Sitting	4 - 6 hours	Distance	No	Yes	No	Yes	Yes	No	Yes	Eye exercise	Eye exercises	Within the last year	Check up	No treatment
2021-03-12 08:01:30	16-17	Male	Yes	Afro-Trinidadian	Rural area	5 years & above	1	Form 5	7	Yes	Laptop/Macbook	0	1	0	More than 6 hours	>6hrs	4-6 hours	4-6hrs	Neither glasses nor contact lenses	0	-1	0	1	0	0	Laying down	2 - 4 hours	I see well both near and distance	No	Yes	No	No	No	No	Yes	Eye rubbing	Gentle rubbing of the eyes	More than a year ago	Glasses	Spectacles
2021-03-02 18:36:08	18-19	Female	Yes	Indo-Trinidad	Urban area	5 years & above	5	Form 6	5	Yes	Laptop/Macbook	0	1	0	2-4 hours	2-4hrs	4-6 hours	4-6hrs	Neither glasses nor contact lenses	0	-1	0	1	0	0	Laying down	2 - 4 hours	Distance	No	Yes	Yes	No	No	No	Yes	Ice on forehead	I put Ice on my forehead for headaches, and I also rubbed my forehead.	More than a year ago
2021-03-22 13:25:19	16-17	Female	Yes	Indo-Trinidad	Urban area	5 years & above	2	Form 6	2	Yes	Laptop/Macbook	0	1	0	4-6 hours	4-6hrs	almost all day	>6hrs	Neither glasses nor contact lenses	0	-1	1	0	0	0	Sitting	1 - 2 hours	Distance	No	Yes	No	No	Yes	No	Yes	Lower screen brightness	Darken the light on the phone	Never had an eye exam
2021-03-09 08:27:39	12-13	Female	Yes	Indo-Trinidad	Urban area	5 years & above	6	Form 2	4	Yes	Laptop/Macbook	0	1	0	Less than an hour	<2hrs	2-4 hours	2-4hrs	Neither glasses nor contact lenses	0	0	1	0	0	0	Sitting	4 - 6 hours	I see well both near and distance	No	Yes	Yes	No	Yes	Yes	No	Nothing	Nothing	More than a year ago	Glasses	Spectacles
2021-03-10 09:03:08	14-15	Male	Yes	Indo-Trinidad	Rural area	5 years & above	5	Form 2	5	Yes	Phone	0	0	1	1-2 hours	<2hrs	4-6 hours	4-6hrs	Neither glasses nor contact lenses	0	-1	0	0	1	0	Standing	4 - 6 hours	Near	No	No	No	No	No	No	No	Nothing	Nothing	More than 2 years ago	Medication	Medication
2021-03-24 09:05:55	14-15	Male	Yes	Indo-Trinidad	Urban area	5 years & above	5	Form 3	1	Yes	Desktop	0	1	0	More than 6 hours	>6hrs	4-6 hours	4-6hrs	Neither glasses nor contact lenses	0	-1	1	0	0	0	Sitting	More than 6 hours	I see well both near and distance	No	No	No	No	No	No	No	Nothing	Nothing	More than 2 years ago	Medication	Medication
2021-03-24 09:01:18	14-15	Male	Yes	Other	Rural area	5 years & above	3	Form 3	1	Yes	Laptop/Macbook	0	1	0	1-2 hours	<2hrs	Less than an hour	<2hrs	Neither glasses nor contact lenses	0	-1	1	0	0	0	Sitting	1 - 2 hours	I see well both near and distance	No	Yes	Yes	Yes	No	Yes	No	Nothing	No money	More than a year ago	Glasses	Spectacles
2021-03-23 14:35:16	18-19	Male	Yes	Indo-Trinidad	Urban area	5 years & above	3	Form 6	6	Yes	Laptop/Macbook	0	1	0	2-4 hours	2-4hrs	4-6 hours	4-6hrs	Glasses	1	1	1	0	0	0	Sitting	1 - 2 hours	Distance	No	Yes	Yes	Yes	Yes	Yes	Yes	Rub eyes	Rub my eyes	Within the last 6 months	Glasses	Spectacles
2021-03-08 18:32:03	16-17	Male	Yes	Indo-Trinidad	Rural area	5 years & above	7	Form 4	5	Yes	Laptop/Macbook	0	1	0	4-6 hours	4-6hrs	4-6 hours	4-6hrs	Neither glasses nor contact lenses	0	-1	1	0	0	0	Sitting	More than 6 hours	I see well both near and distance	No	Yes	No	No	Yes	No	Yes	Self medication	Take painkillers	More than 2 years ago
2021-03-22 12:52:38	16-17	Prefer not to say	Yes	Indo-Trinidad	Rural area	5 years & above	1	Form 6	4	Yes	Laptop/Macbook	0	1	0	More than 6 hours	>6hrs	Almost the entire day	>6hrs	Neither glasses nor contact lenses	0	-1	1	1	0	1	Sitting, Laying down	4 - 6 hours	Near	No	Yes	No	No	No	No	Yes	Self medication	Panadol when i get headache	More than 2 years ago
2021-03-08 20:27:18	12-13	Male	Yes	Mixed	Rural area	5 years & above	1	Form 2	1	Yes	Laptop/Macbook	0	1	0	More than 8 hours	>6hrs	4-6 hours	4-6hrs	Glasses	1	1	0	1	0	0	Laying down	More than 6 hours	Distance	Inward	No	Yes	Yes	No	No	Yes	Self medication	Panadol	Within the last 6 months	Glasses	Spectacles
2021-03-02 13:47:13	12-13	Male	Yes	Indo-Trinidad	Urban area	5 years & above	4	Form 2	2	Yes	Laptop/Macbook	0	1	0	2-4 hours	2-4hrs	4-6 hours	4-6hrs	Neither glasses nor contact lenses	0	-1	1	0	0	0	Sitting	1 - 2 hours	I see well both near and distance	No	Yes	No	No	No	No	Yes	Self medication	Panadol	last 8 years I guess
2021-03-08 22:50:47	14-15	Male	Yes	Afro-Trinidadian	Rural area	5 years & above	3	Form 2	3	Yes	Phone	0	0	1	More than 6 hours	>6hrs	4-6 hours	4-6hrs	Neither glasses nor contact lenses	0	0	1	0	0	0	Sitting	2 - 4 hours	Near	No	Yes	No	No	Yes	Yes	Yes	Self medication	Painkillers to resolve headaches	Within the last 6 months	Glasses	Spectacles
2021-03-02 21:21:33	14-15	Male	Yes	Indo-Trinidad	Urban area	5 years & above	3	Form 2	4	Yes	Phone	0	0	1	2-4 hours	2-4hrs	4-6 hours	4-6hrs	Neither glasses nor contact lenses	0	0	1	0	0	0	Sitting	More than 6 hours	Distance	No	Yes	No	No	Yes	Yes	Yes	Self medication	Painkillers to resolve headaches	Within the last 6 months	Glasses	Spectacles
2021-03-08 18:00:19	14-15	Female	Yes	Indo-Trinidad	Rural area	5 years & above	6	Form 2	4	Yes	Phone	0	0	1	More than 6 hours	>6hrs	2-4 hours	2-4hrs	Neither glasses nor contact lenses	0	-1	0	1	0	0	Laying down	2 - 4 hours	Near	No	Yes	Yes	Yes	Yes	No	Yes	Self medication	Natural tears eye drops to moisturize the eye	Within the last 6 months
2021-03-08 16:08:54	14-15	Male	Yes	Other	Rural area	5 years & above	6	Form 2	4	No	Phone	0	0	1	Less than an hour	<2hrs	4-6 hours	4-6hrs	Neither glasses nor contact lenses	0	0	1	0	0	0	Sitting	Less than 1 hour	I see well both near and distance	No	Yes	Yes	Yes	Yes	No	Yes	Self medication	Natural tears eye drops to moisturize the eye	Within the last 6 months
2021-03-22 10:34:07	14-15	Male	Yes	Mixed	Rural area	5 years & above	6	Form 3	1	Yes	Phone	0	0	1	4-6 hours	4-6hrs	2-4 hours	2-4hrs	Neither glasses nor contact lenses	0	-1	1	1	0	1	Sitting, Laying down	1 - 2 hours	I see well both near and distance	No	Yes	Yes	Yes	Yes	Yes	Yes	Self medication	Medicine	More than 2 years ago	Medication	Medication
2021-03-22 10:26:01	14-15	Male	Yes	Afro-Trinidadian	Rural area	5 years & above	1	Form 3	2	Yes	Laptop/Macbook	0	1	0	1-2 hours	<2hrs	4-6 hours	4-6hrs	Neither glasses nor contact lenses	0	-1	1	0	0	0	Sitting	1 - 2 hours	I see well both near and distance	No	Yes	No	No	No	No	Yes	Self medication	Medicine	More than 2 years ago	Eye drops	Medication
2021-03-24 09:05:39	14-15	Male	Yes	Indo-Trinidad	Urban area	5 years & above	3	Form 3	4	Yes	Phone	0	0	1	More than 6 hours	>6hrs	4-6 hours	4-6hrs	Neither glasses nor contact lenses	0	-1	1	0	0	0	Sitting	4 - 6 hours	I see well both near and distance	No	Yes	No	No	No	No	Yes	Self medication	Medications	Within the last 6 months	Glasses	Spectacles
2021-03-24 09:32:06	14-15	Male	Yes	Other	Urban area	5 years & above	3	Form 3	5	Yes	Laptop/Macbook	0	1	0	4-6 hours	4-6hrs	4-6 hours	4-6hrs	Neither glasses nor contact lenses	0	-1	1	0	0	0	Sitting	More than 6 hours	Near	No	Yes	Yes	No	No	No	Yes	Self medication	I used eyedrops for dry eyes	More than a year ago
2021-03-22 10:28:22	14-15	Female	Yes	Afro-Trinidadian	Urban area	5 years & above	3	Form 3	6	Yes	Laptop/Macbook	0	1	0	4-6 hours	4-6hrs	4-6 hours	4-6hrs	Neither glasses nor contact lenses	0	0	1	0	0	0	Sitting	Less than 1 hour	Distance	No	No	Yes	No	No	No	Yes	Self medication	I used eye drops and eye cleaning liquid	More than 2 years ago
2021-03-23 09:06:03	16-17	Male	Yes	Other	Urban area	5 years & above	2	Form 4	2	Yes	Phone	0	0	1	1-2 hours	<2hrs	4-6 hours	4-6hrs	Neither glasses nor contact lenses	0	-1	1	0	0	0	Sitting	4 - 6 hours	I see well both near and distance	No	No	No	Yes	No	No	Yes	Self medication	I used eye drops	Within the last 6 months	Glasses	Spectacles
2021-03-02 19:08:41	14-15	Male	Yes	Indo-Trinidad	Urban area	5 years & above	3	Form 4	2	Yes	Laptop/Macbook	0	1	0	4-6 hours	4-6hrs	2-4 hours	2-4hrs	Neither glasses nor contact lenses	0	-1	1	0	0	0	Sitting	2 - 4 hours	I see well both near and distance	No	Yes	Yes	Yes	Yes	No	Yes	Self medication	I used eye drops	More than 2 years ago	Eye drops	Medication
2021-03-23 09:04:55	14-15	Male	Yes	Other	Urban area	5 years & above	2	Form 4	2	Yes	Laptop/Macbook	0	1	0	2-4 hours	2-4hrs	4-6 hours	4-6hrs	Neither glasses nor contact lenses	0	-1	1	0	0	0	Sitting	4 - 6 hours	I see well both near and distance	No	Yes	Yes	Yes	No	No	Yes	Self medication	I use eye drops.	More than 2 years ago	Vision Therapy	VT
2021-03-02 23:14:03	14-15	Female	Yes	Indo-Trinidad	Urban area	5 years & above	3	Form 4	4	Yes	Laptop/Macbook	0	1	0	2-4 hours	2-4hrs	4-6 hours	4-6hrs	Neither glasses nor contact lenses	0	-1	1	0	0	0	Sitting	4 - 6 hours	I see well both near and distance	No	Yes	No	No	No	No	Yes	Self medication	I personally took paracetamol for this particular problem.	4 years ago
2021-03-05 08:22:36	16-17	Male	Yes	Mixed	Rural area	5 years & above	1	Form 4	5	No	I don't have one I does have to use my my cousin phone	0	0	1	2-4 hours	2-4hrs	1-2 hours	<2hrs	Neither glasses nor contact lenses	0	1	1	1	0	1	Sitting, Laying down, Other	Less than 1 hour	I see well both near and distance	No	Yes	Yes	Yes	Yes	Yes	Yes	Self medication	I Applied various brands of eye-drops such as; Vizulize for irritated eyes as well as an antibacterial eye drop (Cyprofloxacin & Dexamethasone Eye/ Ear Drops) for a bacterial infection. I also tried to reduce glare and brightness on the computer screen when in use.	Never had an eye exam
2021-03-02 19:03:01	14-15	Female	Yes	Indo-Trinidad	Urban area	5 years & above	4	Form 4	7	Yes	Laptop/Macbook	0	1	0	2-4 hours	2-4hrs	4-6 hours	4-6hrs	Neither glasses nor contact lenses	0	-1	1	0	0	0	Sitting	4 - 6 hours	I see well both near and distance	No	Yes	No	No	No	No	Yes	Self medication	Headache Tablets	when i was testing for my glasses	Glasses	Spectacles
2021-03-06 10:25:51	16-17	Male	Yes	Indo-Trinidad	Urban area	5 years & above	5	Form 5	1	Yes	Laptop/Macbook	0	1	0	More than 6 hours	>6hrs	4-6 hours	4-6hrs	Neither glasses nor contact lenses	0	-1	1	0	0	0	Sitting	4 - 6 hours	Near	No	Yes	Yes	Yes	Yes	No	Yes	Self medication	Eye drops (pred forte)	Within the last 6 months	Eye drops	Medication
2021-03-16 14:05:47	16-17	Female	Yes	Indo-Trinidad	Rural area	5 years & above	7	Form 5	1	Yes	Phone	0	0	1	2-4 hours	2-4hrs	4-6 hours	4-6hrs	Neither glasses nor contact lenses	0	-1	1	0	0	0	Sitting	1 - 2 hours	Distance	No	No	Yes	Yes	Yes	No	Yes	Self medication	Eye drops	More than a year ago	Glasses	Spectacles
2021-03-25 13:18:26	16-17	Female	Yes	Indo-Trinidad	Urban area	5 years & above	2	Form 5	4	Yes	Laptop/Macbook	0	1	0	2-4 hours	2-4hrs	4-6 hours	4-6hrs	Neither glasses nor contact lenses	0	-1	1	0	0	0	Sitting	1 - 2 hours	Distance	No	Yes	Yes	Yes	Yes	Yes	Yes	Self medication	eye drops	Within the last 6 months	Glasses	Spectacles
2021-03-05 14:19:48	16-17	Male	Yes	Indo-Trinidad	Urban area	5 years & above	5	Form 5	5	Yes	Phone	0	0	1	2-4 hours	2-4hrs	4-6 hours	4-6hrs	Neither glasses nor contact lenses	0	-1	1	1	0	1	Sitting, Laying down	Less than 1 hour	I see well both near and distance	No	Yes	Yes	Yes	Yes	Yes	Yes	Self medication	Eye drops	Never had an eye exam	Eye drops	Medication
2021-03-15 15:06:39	18-19	Female	Yes	Indo-Trinidad	Urban area	5 years & above	3	Form 6	1	Yes	Laptop/Macbook	0	1	0	2-4 hours	2-4hrs	4-6 hours	4-6hrs	Neither glasses nor contact lenses	0	-1	1	0	0	0	Sitting	4 - 6 hours	I see well both near and distance	No	No	Yes	No	No	No	Yes	Self medication	Eye drops	Within the last 6 months	Eye drops	Medication
2021-03-02 19:27:53	18-19	Female	Yes	Indo-Trinidad	Urban area	5 years & above	3	Form 6	1	Yes	Laptop/Macbook	0	1	0	2-4 hours	2-4hrs	4-6 hours	4-6hrs	Glasses	1	1	1	0	0	0	Sitting	4 - 6 hours	Distance	No	No	No	No	No	No	Yes	Self medication	Excedrin Migraine Tablets (pain killer)	More than 2 years ago
2021-03-03 07:22:08	18-19	Female	Yes	Indo-Trinidad	Urban area	5 years & above	3	Form 6	6	Yes	Laptop/Macbook	0	1	0	2-4 hours	2-4hrs	4-6 hours	4-6hrs	Glasses	1	1	1	0	0	0	Sitting	4 - 6 hours	Distance	No	Yes	No	No	No	No	Yes	Self-medication	When I got the headace I put some bayrum on my head	More than 2 years ago	Na	No treatment
2021-03-13 11:25:53	16-17	Female	Yes	Indo-Trinidad	Urban area	5 years & above	6	Form 4	4	Yes	Tablet/iPad	1	0	0	Less than an hour	>6hrs	4-6 hours	4-6hrs	Glasses	1	1	1	0	0	0	Sitting	More than 6 hours	I see well both near and distance	No	No	Yes	No	No	No	Yes	Self-medication	Using eye drops and trying to look away at times more	More than a year ago	Glasses	Spectacles
2021-03-18 08:26:22	16-17	Female	Yes	Indo-Trinidad	Urban area	5 years & above	7	Form 5	5	Yes	Laptop/Macbook	0	1	0	More than 6 hours	>6hrs	4-6 hours	4-6hrs	Glasses	1	1	1	0	0	0	Sitting	1 - 2 hours	Distance	No	Yes	No	Yes	Yes	Yes	Yes	Self-medication	Use medication. (Panadol).	Within the last 6 months	Glasses	Spectacles
2021-03-09 19:37:05	14-15	Female	Yes	Other	Rural area	5 years & above	1	Form 4	7	Yes	Laptop/Macbook	0	1	0	4-6 hours	4-6hrs	8 hours	>6hrs	Neither glasses nor contact lenses	0	-1	1	0	0	0	Sitting	More than 6 hours	I see well both near and distance	No	Yes	No	Yes	No	No	Yes	Self-medication	Use eye drops	Never had an eye exam
2021-03-22 11:20:26	16-17	Female	Yes	Mixed	Rural area	5 years & above	6	Form 5	1	Yes	Laptop/Macbook	0	1	0	2-4 hours	2-4hrs	4-6 hours	4-6hrs	Glasses	1	1	1	0	0	0	Sitting	1 - 2 hours	Distance	No	No	No	No	No	No	Yes	Self-medication	To resolve the symptoms i would take pain killers and drink lots of water. I would also get alot of sleep.	Within the last year	Eye drops	Medication
2021-03-23 14:14:37	18-19	Female	Yes	Afro-Trinidadian	Urban area	5 years & above	2	Form 6	6	Yes	Laptop/Macbook	0	1	0	2-4 hours	2-4hrs	About 8 hrs	>6hrs	Neither glasses nor contact lenses	0	-1	1	0	0	0	Sitting	1 - 2 hours	I see well both near and distance	No	Yes	No	No	No	No	Yes	Self-medication	Take a pandol for the headache and rest my eyes from the device a bit	More than 2 years ago	None	None
2021-03-02 13:39:41	12-13	Male	No	Indo-Trinidad	Rural area	5 years & above	2	Form 2	5	Yes	Laptop/Macbook	0	1	0	Less than an hour	<2hrs	4-6 hours	4-6hrs	Neither glasses nor contact lenses	0	-1	1	0	0	0	Sitting	2 - 4 hours	I see well both near and distance	No	Yes	No	No	No	No	Yes	Self-medication	Take a panadol	Within the last 6 months	To check my eyes	No treatment
2021-03-22 11:12:16	16-17	Male	Yes	Mixed	Rural area	5 years & above	1	Form 5	5	Yes	Laptop/Macbook	0	1	0	4-6 hours	4-6hrs	4-6 hours	4-6hrs	Neither glasses nor contact lenses	0	0	1	1	0	1	Sitting, Laying down	4 - 6 hours	I see well both near and distance	No	Yes	No	No	No	No	Yes	Self-medication	Tablets	More than 2 years ago	Eye drops	Medication
2021-03-16 14:07:33	16-17	Female	Yes	Indo-Trinidad	Rural area	5 years & above	2	Form 4	4	Yes	Laptop/Macbook	0	1	0	2-4 hours	2-4hrs	4-6 hours	4-6hrs	Neither glasses nor contact lenses	0	-1	1	0	0	0	Sitting	2 - 4 hours	Distance	No	Yes	No	No	No	No	Yes	Self-medication + Breaks	Take panadol and stay away from device	More than a year ago
2021-03-15 00:18:12	16-17	Female	Yes	Mixed	Urban area	5 years & above	1	Form 4	6	Yes	Tablet and desktop	1	1	0	2-4 hours	2-4hrs	....11-13 hours	>6hrs	Neither glasses nor contact lenses	0	-1	0	0	0	0	Other	More than 6 hours	I see well both near and distance	No	Yes	Yes	Yes	No	No	Yes	Self-medication + Breaks	Take medicine and rest my eyes	Within the last year	Glasses	Spectacles
2021-03-11 16:54:41	12-13	Female	Yes	Mixed	Urban area	5 years & above	5	Form 1	3	Yes	Laptop/Macbook	0	1	0	Less than an hour	<2hrs	4-6 hours	4-6hrs	Neither glasses nor contact lenses	0	-1	1	0	0	0	Sitting	4 - 6 hours	I see well both near and distance	No	Yes	No	No	No	No	Yes	Self-medication + Breaks	Take medication or sleep	More than a year ago
2021-03-01 12:50:59	12-13	Male	Yes	Indo-Trinidad	Urban area	5 years & above	5	Form 1	4	Yes	Laptop/Macbook	0	1	0	1-2 hours	<2hrs	4-6 hours	4-6hrs	Neither glasses nor contact lenses	0	-1	1	0	0	0	Sitting	4 - 6 hours	Distance	No	Yes	No	No	No	No	Yes	Self-medication + Breaks	Take medication and took a break from the device	More than a year ago
2021-03-02 18:57:35	14-15	Female	Yes	Indo-Trinidad	Urban area	5 years & above	2	Form 2	2	Yes	Laptop/Macbook	0	1	0	2-4 hours	2-4hrs	12	>6hrs	Neither glasses nor contact lenses	0	-1	1	0	0	0	Sitting	More than 6 hours	I see well both near and distance	No	Yes	Yes	Yes	Yes	No	Yes	Self-medication + Breaks	1.Take a few seconds to look away from the screen and close eyes. 2. Eyedrops 3.For headaches I use tablets.	More than a year ago
2021-03-08 18:11:26	12-13	Female	Yes	Indo-Trinidad	Rural area	5 years & above	1	Form 2	3	Yes	Laptop/Macbook	0	1	0	1-2 hours	<2hrs	1-2 hours	<2hrs	Neither glasses nor contact lenses	0	-1	1	0	0	0	Sitting	2 - 4 hours	I see well both near and distance	No	Yes	Yes	Yes	Yes	Yes	Yes	Self-medication + lower screen brightness	eye drops and lower screen brightness	More than 2 years ago	Eye drops	Medication
2021-03-16 14:10:50	12-13	Female	Yes	Mixed	Urban area	5 years & above	2	Form 3	2	Yes	Desktop	0	1	0	Less than an hour	<2hrs	4-6 hours	4-6hrs	Neither glasses nor contact lenses	0	-1	1	0	0	0	Sitting	4 - 6 hours	I see well both near and distance	No	Yes	No	No	Yes	No	Yes	Self-medication + Wash face + Breaks	Taking tablets, washing my face and take a rest at lunch time	Within the last year	Glasses	Spectacles
2021-03-24 10:58:53	14-15	Male	Yes	Afro-Trinidadian	Urban area	5 years & above	3	Form 3	3	Yes	Phone	0	0	1	1-2 hours	<2hrs	1-2 hours	<2hrs	Neither glasses nor contact lenses	0	-1	0	1	0	0	Laying down	1 - 2 hours	I see well both near and distance	No	Yes	No	No	No	No	No	Self-spectacles + lower screen brightness		Within the last year	Glasses	Spectacles
2021-03-16 14:08:47	16-17	Female	Yes	Mixed	Rural area	5 years & above	3	Form 3	6	Yes	Phone	0	0	1	1-2 hours	<2hrs	4-6 hours	4-6hrs	Neither glasses nor contact lenses	0	-1	1	1	0	1	Sitting, Laying down	Less than 1 hour	I see well both near and distance	No	Yes	No	No	Yes	No	Yes	Shutting eyes	I tried closing my eyes for a couple minutes.	More than 2 years ago
2021-03-16 20:38:41	14-15	Female	Yes	Other	Rural area	5 years & above	5	Form 3	7	Yes	Tablet/iPad	1	0	0	1-2 hours	<2hrs	1-2 hours	<2hrs	Neither glasses nor contact lenses	0	-1	1	0	0	0	Sitting	Less than 1 hour	I see well both near and distance	No	Yes	No	No	No	No	Yes	Visited ECP	Will I got new glasses and some of the symptoms cleared up eh headaches	Within the last 6 months	Glasses	Spectacles
2021-03-23 09:09:31	14-15	Male	Yes	Mixed	Urban area	5 years & above	3	Form 4	2	Yes	Laptop/Macbook	0	1	0	2-4 hours	2-4hrs	4-6 hours	4-6hrs	Neither glasses nor contact lenses	0	-1	1	0	0	0	Sitting	2 - 4 hours	I see well both near and distance	No	Yes	No	Yes	Yes	Yes	Yes	Visited ECP	I went to the Optometrist	Within the last 6 months	Glasses	Spectacles
2021-03-23 09:08:08	16-17	Male	Yes	Mixed	Urban area	5 years & above	2	Form 4	3	Yes	Laptop/Macbook	0	1	0	1-2 hours	<2hrs	1-2 hours	<2hrs	Neither glasses nor contact lenses	0	-1	1	0	0	0	Sitting	Less than 1 hour	Distance	No	Yes	Yes	No	No	No	Yes	Visited ECP	i went to a eye test	like 1 to 2 weeks ago	Glasses	Spectacles
2021-03-23 09:08:42	14-15	Male	Yes	Indo-Trinidad	Rural area	5 years & above	4	Form 4	3	Yes	Laptop/Macbook	0	1	0	2-4 hours	2-4hrs	Less than an hour	<2hrs	Neither glasses nor contact lenses	0	-1	1	0	0	0	Sitting	2 - 4 hours	I see well both near and distance	No	Yes	No	No	No	No	Yes	Visited ECP	I went and it me Yh eyes tested and I wear glasses now for my phone screen and for when going out into the sum light. And I also try to look always from the screen and close my eyes for five minutes	Within the last 6 months	Glasses	Spectacles
2021-03-11 16:41:52	14-15	Female	Yes	Mixed	Urban area	5 years & above	3	Form 4	3	Yes	Tablet/iPad	1	0	0	2-4 hours	2-4hrs	More than 6 hours	>6hrs	Neither glasses nor contact lenses	0	-1	1	0	0	0	Sitting	More than 6 hours	I see well both near and distance	No	No	Yes	No	Yes	Yes	Yes	Visited ECP	I updated my glasses prescription	Within the last 6 months	Glasses	Spectacles
2021-03-23 09:05:25	14-15	Male	Yes	Indo-Trinidad	Urban area	5 years & above	5	Form 4	6	Yes	Laptop/Macbook	0	1	0	2-4 hours	2-4hrs	4-6 hours	4-6hrs	Neither glasses nor contact lenses	0	-1	1	0	0	0	Sitting	More than 6 hours	I see well both near and distance	No	Yes	Yes	No	Yes	No	Yes	Visited ECP	I resolved my issue be going to the optometrist.	Within the last year	Glasses	Spectacles
2021-03-08 17:22:45	16-17	Male	Yes	Afro-Trinidadian	Urban area	5 years & above	1	Form 4	6	Yes	Laptop/Macbook	0	1	0	I never really had a digital device, I only got one when i needed to have one for online schooling.	4-6hrs	I spend atleast 8 hours on my device or more daily, 5 hours back to back for school and the rest just for revising or reviewing other school work.	>6hrs	Glasses	1	1	1	0	0	0	Sitting	More than 6 hours	I see well both near and distance	No	Yes	No	No	Yes	No	Yes	Visited ECP	I have to change my lenses to a stronger focus and I take medicine when necessary for heasaches.	Within the last 6 months	Glasses	Spectacles
2021-03-23 09:06:11	14-15	Male	Yes	Indo-Trinidad	Rural area	5 years & above	5	Form 4	6	Yes	Phone	0	0	1	Less than an hour	<2hrs	4-6 hours	4-6hrs	Neither glasses nor contact lenses	0	-1	1	0	0	0	Sitting	1 - 2 hours	I see well both near and distance	No	Yes	Yes	Yes	Yes	No	Yes	Visited ECP	I have migraine so my doctor prescribed tablets for me and I usually sleep	Within the last 6 months	Glasses	Spectacles
2021-03-21 21:09:59	14-15	Female	Yes	Indo-Trinidad	Urban area	5 years & above	5	Form 4	7	Yes	Laptop/Macbook	0	1	0	2-4 hours	2-4hrs	15 hours	>6hrs	Neither glasses nor contact lenses	0	-1	1	0	0	0	Sitting	More than 6 hours	Distance	No	No	No	No	No	No	Yes	Visited ECP	I got an eye-test and well I'm currently wearing glasses	Last two months	Glasses	Spectacles
2021-03-16 14:11:14	16-17	Female	Yes	Other	Rural area	5 years & above	5	Form 5	2	Yes	Laptop/Macbook	0	1	0	Less than an hour	<2hrs	10 hours	>6hrs	Neither glasses nor contact lenses	0	-1	1	0	0	0	Sitting	More than 6 hours	I see well both near and distance	No	Yes	Yes	No	No	No	No	Visited ECP	Got glasses	Within the last year	Glasses	Spectacles
2021-03-11 10:20:52	18-19	Female	Yes	Indo-Trinidad	Urban area	5 years & above	3	Form 5	2	Yes	Laptop/Macbook	0	1	0	1-2 hours	<2hrs	10hrs	>6hrs	Glasses	1	0	1	0	0	0	Sitting	1 - 2 hours	I see well both near and distance	No	Yes	No	Yes	Yes	No	Yes	Visited ECP	Going to the doctor	More than 2 years ago	Glasses	Spectacles
2021-03-16 21:33:36	18-19	Female	Yes	Afro-Trinidadian	Urban area	5 years & above	7	Form 6	3	Yes	Tablet/iPad	1	0	0	2-4 hours	2-4hrs	4-6 hours	4-6hrs	Neither glasses nor contact lenses	0	-1	0	1	0	0	Laying down	More than 6 hours	Distance	Inward	Yes	No	No	Yes	No	Yes	Visited ECP	By wearing a blue light repelling glasses	More than a year ago	Glasses	Spectacles
2021-03-18 18:56:06	18-19	Female	Yes	Afro-Trinidadian	Urban area	5 years & above	3	Form 6	5	Yes	Tablet/iPad	1	0	0	2-4 hours	2-4hrs	4-6 hours	4-6hrs	Neither glasses nor contact lenses	0	-1	0	1	0	0	Laying down	More than 6 hours	Distance	Inward	Yes	Yes	Yes	Yes	No	Yes	Visited ECP	Before I started getting blurry vision, I bought the blue light blocking glasses to prevent my eyes from damaging but it didn’t help. Eventually I started seeing blurry and I took an eye test and got glasses.	Within the last 6 months	Glasses	Spectacles
2021-03-17 10:41:49	18-19	Female	Yes	Afro-Trinidadian	Urban area	5 years & above	6	Form 6	6	Yes	Tablet/iPad	1	0	0	2-4 hours	2-4hrs	4-6 hours	4-6hrs	Neither glasses nor contact lenses	0	-1	0	1	0	0	Laying down	More than 6 hours	Distance	Inward	Yes	Yes	Yes	Yes	Yes	Yes	Wash face	Rub temples with vapour rub for headaches Drink water to clear open eyes and become more aware. Wash face and eyes.	More than 2 years ago	Glasses	Spectacles
2021-03-17 08:47:55	18-19	Female	Yes	Afro-Trinidadian	Urban area	5 years & above	2	Form 6	6	Yes	Tablet/iPad	1	0	0	2-4 hours	2-4hrs	4-6 hours	4-6hrs	Neither glasses nor contact lenses	0	-1	0	1	0	0	Laying down	More than 6 hours	Distance	Inward	Yes	Yes	No	Yes	Yes	Yes	Wash face	I wash out my eyes with water	More than a year ago	Glasses	Spectacles
2021-03-26 07:00:37	12-13	Female	Yes	Indo-Trinidad	Urban area	5 years & above	5	Form 1	3	Yes	Laptop/Macbook	0	1	0	1-2 hours	<2hrs	10 hours	>6hrs	Neither glasses nor contact lenses	0	-1	1	0	0	0	Sitting	1 - 2 hours	I see well both near and distance	No	Yes	No	Yes	Yes	No	Yes	Washed face	Wash my face or decrease the brightness on my device	More than 2 years ago	Just an eye test to see who need glasses	None
2021-03-01 09:56:20	12-13	Male	Yes	Mixed	Urban area	5 years & above	6	Form 1	4	Yes	Laptop/Macbook	0	1	0	1-2 hours	<2hrs	2-4 hours	2-4hrs	Neither glasses nor contact lenses	0	-1	1	0	0	0	Sitting	1 - 2 hours	I see well both near and distance	No	No	Yes	No	No	No	Yes	Washed face	Wash my face	More than 2 years ago	Glasses and eye drops	Spectacles
2021-03-02 09:35:25	12-13	Male	Yes	Other	Rural area	5 years & above	1	Form 1	4	Yes	Laptop/Macbook	0	1	0	More than 6 hours	>6hrs	4-6 hours	4-6hrs	Neither glasses nor contact lenses	0	-1	1	0	0	0	Sitting	4 - 6 hours	I see well both near and distance	No	Yes	Yes	No	No	No	Yes	Washed face	WASH MY EYES WHAT ELSE GOON?	Within the last 6 months	Glasses	Spectacles
2021-03-02 17:49:24	12-13	Male	Yes	Indo-Trinidad	Rural area	5 years & above	5	Form 1	4	Yes	Laptop/Macbook	0	1	0	1-2 hours	<2hrs	4-6 hours	4-6hrs	Glasses	1	1	1	0	0	0	Sitting	Less than 1 hour	Distance	No	Yes	No	No	Yes	No	Yes	Washed face	Wash eyes, Take a nap	Within the last 6 months	Glasses	Spectacles
2021-03-08 20:55:24	12-13	Female	Yes	Other	Urban area	5 years & above	1	Form 1	5	Yes	Laptop/Macbook	0	1	0	2-4 hours	2-4hrs	4-6 hours	4-6hrs	Neither glasses nor contact lenses	0	-1	1	0	0	0	Sitting	4 - 6 hours	I see well both near and distance	No	Yes	Yes	Yes	No	No	No	Washed face	Wash eyes	3 or 4 months	Glasses	Spectacles
2021-03-17 08:12:58	12-13	Female	Yes	Other	Rural area	5 years & above	3	Form 1	5	Yes	Laptop/Macbook	0	1	0	2-4 hours	2-4hrs	7-8 above	>6hrs	Neither glasses nor contact lenses	0	0	1	0	0	0	Sitting	More than 6 hours	I see well both near and distance	No	Yes	Yes	Yes	Yes	No	Yes	Washed face	In Order For My Eyes To Stop Being Blurry And Stop Itch I Simply Wash My Face Or Sometimes Go In Front The Fan Although It Doesn't Work All The Time.	Within the last year	Vision Therapy	VT
2021-03-16 13:03:44	12-13	Female	Yes	Afro-Trinidadian	Rural area	Less than 1 year	2	Form 1	5	Yes	Laptop/Macbook	0	1	0	4-6 hours	4-6hrs	4-6 hours	4-6hrs	Neither glasses nor contact lenses	0	-1	1	0	0	0	Sitting	2 - 4 hours	Distance	No	Yes	Yes	Yes	Yes	No	Yes	Washed face	In Order For My Eyes To Stop Being Blurry And Stop Itch I Simply Wash My Face Or Sometimes Go In Front The Fan Although It Doesn't Work All The Time.	Within the last year	Vision Therapy	VT
2021-03-22 12:01:56	12-13	Female	Yes	Mixed	Rural area	5 years & above	2	Form 1	6	Yes	Phone	0	0	1	Less than an hour	<2hrs	4-6 hours	4-6hrs	Neither glasses nor contact lenses	0	-1	1	0	0	0	Sitting	4 - 6 hours	Distance	No	Yes	Yes	Yes	No	No	Yes	Washed face + Breaks	Try washing my face and taking A break from the device.	More than 2 years ago
2021-03-08 19:17:05	12-13	Female	Yes	Indo-Trinidad	Urban area	5 years & above	3	Form 1	7	Yes	Laptop/Macbook	0	1	0	Less than an hour	<2hrs	4-6 hours	4-6hrs	Neither glasses nor contact lenses	0	-1	1	0	0	0	Sitting	1 - 2 hours	I see well both near and distance	No	Yes	No	No	No	Yes	No		Not applicable	4 years	No applicable	No treatment
2021-03-08 15:36:31	12-13	Male	Yes	Indo-Trinidad	Rural area	5 years & above	4	Form 1	7	No	None	0	0	0	Less than an hour	<2hrs	Less than an hour	<2hrs	Neither glasses nor contact lenses	0	-1	1	0	0	0	Sitting	4 - 6 hours	I see well both near and distance	No	Yes	Yes	No	No	No	No		Not applicable	More than 2 years ago	Not applicable	No treatment
2021-03-02 12:19:16	14-15	Male	Yes	Mixed	Rural area	5 years & above	7	Form 2	1	Yes	Desktop	0	1	0	4-6 hours	4-6hrs	2-4 hours	2-4hrs	Neither glasses nor contact lenses	0	-1	1	0	0	0	Sitting	More than 6 hours	I see well both near and distance	No	No	No	No	No	No	No		not applicable	More than a year ago	not applicable	No treatment
2021-03-19 10:34:00	14-15	Female	Yes	Indo-Trinidad	Urban area	5 years & above	7	Form 2	1	Yes	Laptop/Macbook	0	1	0	1-2 hours	<2hrs	Almost all day	>6hrs	Glasses	1	1	1	0	0	0	Sitting	More than 6 hours	Distance	No	Yes	Yes	Yes	Yes	No	Yes		No change in symptoms	Within the last 6 months	Vision Therapy	VT
2021-03-08 16:33:57	14-15	Female	Yes	Afro-Trinidadian	Rural area	5 years & above	2	Form 2	1	Yes	Tablet/iPad	1	0	0	4-6 hours	4-6hrs	4-6 hours	4-6hrs	Neither glasses nor contact lenses	0	0	1	0	0	0	Sitting	4 - 6 hours	I see well both near and distance	No	Yes	No	No	No	No	No		No	More than 2 years ago	Nothing.	None
2021-03-10 10:16:44	12-13	Female	Yes	Afro-Trinidadian	Rural area	5 years & above	1	Form 2	1	Yes	Laptop/Macbook	0	1	0	4-6 hours	4-6hrs	4-6 hours	4-6hrs	Neither glasses nor contact lenses	0	0	1	0	0	0	Sitting	4 - 6 hours	I see well both near and distance	No	No	No	No	No	No	No		No	I never got one sins	Eye drops	Medication
2021-03-02 12:22:40	12-13	Male	Yes	Indo-Trinidad	Urban area	5 years & above	6	Form 2	2	Yes	Phone	0	0	1	More than 6 hours	>6hrs	4-6 hours	4-6hrs	Neither glasses nor contact lenses	0	-1	1	0	0	0	Sitting	Less than 1 hour	I see well both near and distance	No	Yes	No	No	No	No	No		no	More than a year ago
2021-03-09 10:42:08	14-15	Female	Yes	Mixed	Rural area	1-2 years	6	Form 2	2	Yes	Phone and tablet	1	0	1	More than 6 hours	>6hrs	Less than an hour	<2hrs	Neither glasses nor contact lenses	0	0	1	0	0	0	Sitting	More than 6 hours	I see well both near and distance	Outward	No	Yes	No	Yes	No	No		No	Within the last year
2021-03-08 16:51:13	14-15	Female	Yes	Mixed	Rural area	5 years & above	1	Form 2	2	Yes	Laptop/Macbook	0	1	0	More than 6 hours	>6hrs	12 hours	>6hrs	Neither glasses nor contact lenses	0	-1	1	0	0	0	Sitting	More than 6 hours	Distance	No	No	Yes	No	Yes	No	No		No	Within the last year
2021-03-20 20:32:20	14-15	Female	Yes	Indo-Trinidad	Rural area	5 years & above	4	Form 2	2	Yes	Phone	0	0	1	More than 6 hours	>6hrs	4-6 hours	4-6hrs	Neither glasses nor contact lenses	0	0	1	0	0	0	Sitting	4 - 6 hours	Distance	No	Yes	No	No	No	No	No		N/A	Never had an eye exam
2021-03-02 12:52:18	14-15	Male	Yes	Mixed	Rural area	5 years & above	2	Form 2	2	Yes	Laptop/Macbook	0	1	0	1-2 hours	<2hrs	1-2 hours	<2hrs	Neither glasses nor contact lenses	0	-1	0	1	0	0	Laying down	1 - 2 hours	I see well both near and distance	No	Yes	No	No	Yes	Yes	Yes		Less usage of my device on break times, take a headache tablet and massage my head daily.	More than 2 years ago	Medication	Medication
2021-03-05 16:39:36	12-13	Male	Yes	Afro-Trinidadian	Urban area	5 years & above	1	Form 2	2	Yes	Laptop/Macbook	0	1	0	4-6 hours	4-6hrs	More than 8 hours	>6hrs	Neither glasses nor contact lenses	0	-1	1	1	0	1	Sitting, Laying down	4 - 6 hours	I see well both near and distance	No	No	No	No	No	No	Yes		Lay down	More than a year ago	Eye drops	Medication
2021-03-07 15:05:10	14-15	Male	Yes	Indo-Trinidad	Rural area	5 years & above	1	Form 2	2	Yes	Laptop/Macbook	0	1	0	Less than an hour	<2hrs	4-6 hours	4-6hrs	Neither glasses nor contact lenses	0	-1	1	0	0	0	Sitting	1 - 2 hours	I see well both near and distance	No	Yes	Yes	Yes	Yes	No	Yes		I would take a lil time off to resolve the issues	Within the last 6 months
2021-03-02 12:18:17	12-13	Male	Yes	Mixed	Urban area	5 years & above	3	Form 2	2	Yes	Phone	0	0	1	4-6 hours	4-6hrs	4-6 hours	4-6hrs	Neither glasses nor contact lenses	0	-1	1	0	0	0	Sitting	1 - 2 hours	Distance	No	Yes	Yes	Yes	No	No	Yes		I would come off my device when I don't have live classes	Within the last 6 months	Vision Therapy	VT
2021-03-24 09:01:45	12-13	Female	Yes	Indo-Trinidad	Urban area	5 years & above	7	Form 2	3	Yes	Desktop	0	1	0	2-4 hours	2-4hrs	4-6 hours	4-6hrs	Neither glasses nor contact lenses	0	0	1	0	1	1	Sitting, Standing	1 - 2 hours	I see well both near and distance	No	Yes	Yes	Yes	Yes	No	Yes		I went by an optometrist	Within the last 6 months	Glasses	Spectacles
2021-03-21 13:28:13	14-15	Female	Yes	Mixed	Urban area	5 years & above	6	Form 2	3	Yes	Tablet/iPad	1	0	0	2-4 hours	2-4hrs	4-6 hours	4-6hrs	Neither glasses nor contact lenses	0	-1	1	0	0	0	Sitting	4 - 6 hours	I see well both near and distance	No	No	No	No	No	No	No		I didnt have any	Years ago	Idk it was years ago	None
2021-03-08 16:59:15	12-13	Female	Yes	Indo-Trinidad	Urban area	5 years & above	5	Form 2	3	Yes	Laptop/Macbook	0	1	0	2-4 hours	2-4hrs	4-6 hours	4-6hrs	Neither glasses nor contact lenses	0	0	1	0	0	0	Sitting	4 - 6 hours	I see well both near and distance	No	No	No	No	No	No	No		Have no symtoms	Within the last year
2021-03-20 17:56:55	14-15	Female	Yes	Mixed	Urban area	5 years & above	4	Form 2	3	Yes	Laptop/Macbook	0	1	0	2-4 hours	2-4hrs	8 hours	>6hrs	Neither glasses nor contact lenses	0	-1	1	0	0	0	Sitting	1 - 2 hours	Distance	No	Yes	Yes	Yes	Yes	Yes	Yes		Do healthy things....	More than 2 years ago	Glasses	Spectacles
2021-03-24 09:01:36	12-13	Female	Yes	Indo-Trinidad	Urban area	5 years & above	6	Form 2	3	Yes	Desktop	0	1	0	2-4 hours	2-4hrs	4-6 hours	4-6hrs	Neither glasses nor contact lenses	0	0	1	0	1	1	Sitting, Standing	1 - 2 hours	I see well both near and distance	No	Yes	No	No	No	No	No		-	More than a year ago	Glasses	Spectacles
2021-03-20 20:46:40	12-13	Female	Yes	Indo-Trinidad	Urban area	5 years & above	2	Form 2	3	Yes	Laptop/Macbook	0	1	0	1-2 hours	<2hrs	4-6 hours	4-6hrs	Neither glasses nor contact lenses	0	-1	1	0	0	0	Sitting	4 - 6 hours	I see well both near and distance	No	No	No	No	No	No	No		-	More than 2 years ago	Glasses	Spectacles
2021-03-08 20:55:11	12-13	Prefer not to say	Yes	Mixed	Rural area	5 years & above	5	Form 2	3	Yes	Phone	0	0	1	1-2 hours	<2hrs	4-6 hours	4-6hrs	Neither glasses nor contact lenses	0	0	1	0	0	0	Sitting	2 - 4 hours	Distance	No	Yes	Yes	No	No	No	No		-	A month ago	Glasses	Spectacles
2021-03-08 20:55:32	12-13	Prefer not to say	Yes	Mixed	Rural area	5 years & above	3	Form 2	3	Yes	Phone	0	0	1	1-2 hours	<2hrs	4-6 hours	4-6hrs	Neither glasses nor contact lenses	0	0	1	0	0	0	Sitting	2 - 4 hours	Distance	No	No	No	Yes	No	No	No			More than a year ago	Vision Therapy	VT
2021-03-02 12:19:33	12-13	Male	Yes	Other	Rural area	5 years & above	4	Form 2	4	Yes	Phone	0	0	1	1-2 hours	<2hrs	4-6 hours	4-6hrs	Neither glasses nor contact lenses	0	-1	1	0	0	0	Sitting	Less than 1 hour	I see well both near and distance	No	No	No	No	No	No	No			Can't remember	Vision Therapy	VT
2021-03-22 19:44:19	12-13	Female	Yes	Afro-Trinidadian	Urban area	5 years & above	3	Form 2	4	Yes	Phone	0	0	1	Less than an hour	<2hrs	4-6 hours	4-6hrs	Neither glasses nor contact lenses	0	-1	1	0	0	0	Sitting	Less than 1 hour	I see well both near and distance	No	Yes	No	No	Yes	No	No			More than a year ago	Vision Therapy	VT
2021-03-01 08:34:57	12-13	Male	Yes	Indo-Trinidad	Urban area	5 years & above	1	Form 2	4	Yes	Laptop/Macbook	0	1	0	4-6 hours	4-6hrs	2-4 hours	2-4hrs	Neither glasses nor contact lenses	0	0	0	1	0	0	Laying down	Less than 1 hour	I see well both near and distance	No	Yes	No	No	No	No	No			Within the last year	Vision Therapy	VT
2021-02-27 16:39:37	14-15	Female	No	Indo-Trinidad	Urban area	5 years & above	1	Form 2	4	Yes	Laptop/Macbook	0	1	0	Less than an hour	<2hrs	2-4 hours	2-4hrs	Neither glasses nor contact lenses	0	-1	1	0	0	0	Sitting	Less than 1 hour	I see well both near and distance	No	Yes	Yes	Yes	Yes	Yes	Yes			More than a year ago	Vision Therapy	VT
2021-03-01 09:40:03	14-15	Male	Yes	Indo-Trinidad	Urban area	5 years & above	2	Form 2	5	Yes	Laptop/Macbook	0	1	0	1-2 hours	<2hrs	2-4 hours	2-4hrs	Neither glasses nor contact lenses	0	-1	1	0	0	0	Sitting	2 - 4 hours	I see well both near and distance	No	Yes	Yes	Yes	Yes	No	No			Within the last 6 months	Surgery	VT
2021-03-02 18:35:55	14-15	Male	Yes	Indo-Trinidad	Urban area	5 years & above	1	Form 2	5	Yes	Laptop/Macbook	0	1	0	2-4 hours	2-4hrs	2-4 hours	2-4hrs	Neither glasses nor contact lenses	0	-1	1	0	0	0	Sitting	4 - 6 hours	I see well both near and distance	No	No	Yes	Yes	Yes	No	No			Within the last year	Glasses	Spectacles
2021-03-08 16:14:50	14-15	Female	Yes	Mixed	Rural area	5 years & above	2	Form 2	5	Yes	Phone	0	0	1	More than 6 hours	>6hrs	7 to 9 or more	>6hrs	Neither glasses nor contact lenses	0	-1	0	1	0	0	Laying down	2 - 4 hours	Near	No	Yes	Yes	No	No	No	No			Within the last year	Glasses	Spectacles
2021-03-08 20:31:18	14-15	Male	Yes	Indo-Trinidad	Urban area	5 years & above	1	Form 2	5	Yes	Tablet/iPad	1	0	0	1-2 hours	<2hrs	4-6 hours	4-6hrs	Neither glasses nor contact lenses	0	-1	1	0	0	0	Sitting	4 - 6 hours	I see well both near and distance	No	No	No	No	No	No	No			Last 2 months	Glasses	Spectacles
2021-03-02 18:46:44	12-13	Male	Yes	Afro-Trinidadian	Urban area	5 years & above	6	Form 2	5	Yes	Phone	0	0	1	1-2 hours	<2hrs	4-6 hours	4-6hrs	Neither glasses nor contact lenses	0	-1	1	0	0	0	Sitting	Less than 1 hour	Distance	No	Yes	Yes	No	No	No	No			Within the last 6 months	Glasses	Spectacles
2021-03-02 19:04:32	14-15	Male	Yes	Indo-Trinidad	Rural area	5 years & above	2	Form 2	6	Yes	Laptop/Macbook	0	1	0	Less than an hour	<2hrs	4-6 hours	4-6hrs	Neither glasses nor contact lenses	0	-1	1	0	0	0	Sitting	1 - 2 hours	I see well both near and distance	No	Yes	No	No	No	No	No			More than a year ago	Glasses	Spectacles
2021-03-01 08:34:19	14-15	Male	Yes	Indo-Trinidad	Urban area	5 years & above	3	Form 2	6	Yes	Phone	0	0	1	1-2 hours	<2hrs	4-6 hours	4-6hrs	Glasses	1	1	1	0	0	0	Sitting	1 - 2 hours	Distance	No	No	No	Yes	Yes	Yes	No			Within the last year	Glasses	Spectacles
2021-03-21 11:08:54	14-15	Female	Yes	Indo-Trinidad	Urban area	5 years & above	3	Form 2	6	Yes	Laptop/Macbook	0	1	0	2-4 hours	2-4hrs	8 hours	>6hrs	Neither glasses nor contact lenses	0	-1	1	0	0	0	Sitting	More than 6 hours	I see well both near and distance	No	Yes	No	No	Yes	No	No			3 months	Glasses	Spectacles
2021-03-08 16:28:05	12-13	Female	Yes	Other	Urban area	5 years & above	2	Form 2	6	Yes	Phone	0	0	1	4-6 hours	4-6hrs	1-2 hours	<2hrs	Neither glasses nor contact lenses	0	-1	0	1	0	0	Laying down	4 - 6 hours	I see well both near and distance	No	No	No	No	No	No	No			Within the last 6 months	Glasses	Spectacles
2021-03-10 09:05:25	14-15	Female	Yes	Indo-Trinidad	Urban area	5 years & above	3	Form 2	6	Yes	Phone	0	0	1	Less than an hour	<2hrs	Less than an hour	<2hrs	Neither glasses nor contact lenses	0	-1	1	0	0	0	Sitting	Less than 1 hour	Distance	No	Yes	No	No	Yes	No	No			More than a year ago	Glasses	Spectacles
2021-03-19 10:59:35	12-13	Female	Yes	Afro-Trinidadian	Rural area	5 years & above	7	Form 2	7	Yes	Phone	0	0	1	1-2 hours	<2hrs	2-4 hours	2-4hrs	Neither glasses nor contact lenses	0	0	1	0	0	0	Sitting	1 - 2 hours	Distance	No	No	No	No	No	No	No			More than 2 years ago	Glasses	Spectacles
2021-03-02 12:54:46	12-13	Male	Yes	Afro-Trinidadian	Urban area	5 years & above	3	Form 2	7	Yes	Laptop/Macbook	0	1	0	1-2 hours	<2hrs	4-6 hours	4-6hrs	Neither glasses nor contact lenses	0	0	1	0	0	0	Sitting	2 - 4 hours	I see well both near and distance	No	Yes	No	Yes	Yes	No	No			More than a year ago	Glasses	Spectacles
2021-03-08 19:11:02	14-15	Female	Yes	Mixed	Urban area	5 years & above	2	Form 2	7	Yes	Phone	0	0	1	More than 6 hours	>6hrs	2-4 hours	2-4hrs	Neither glasses nor contact lenses	0	-1	1	0	0	0	Sitting	2 - 4 hours	Distance	No	Yes	No	Yes	Yes	Yes	No			3-4 months	Glasses	Spectacles
2021-03-10 09:12:48	14-15	Female	Yes	Indo-Trinidad	Rural area	5 years & above	3	Form 2	7	Yes	Phone	0	0	1	Less than an hour	<2hrs	Less than an hour	<2hrs	Neither glasses nor contact lenses	0	-1	1	0	0	0	Sitting	Less than 1 hour	Distance	No	Yes	Yes	Yes	Yes	Yes	No			Within the last year	Glasses	Spectacles
2021-03-19 16:05:01	12-13	Female	Yes	Afro-Trinidadian	Rural area	5 years & above	6	Form 2	7	Yes	Phone	0	0	1	2-4 hours	2-4hrs	6 and upward	>6hrs	Neither glasses nor contact lenses	0	-1	1	0	0	0	Sitting	1 - 2 hours		No	No	No	No	No	No	No			Within the last year	Glasses	Spectacles
2021-03-09 12:35:43	14-15	Male	Yes	Afro-Trinidadian	Rural area	5 years & above	4	Form 2	7	Yes	Laptop/Macbook	0	1	0	More than 6 hours	>6hrs	Less than an hour	<2hrs	Glasses	1	1	1	0	0	0	Sitting	2 - 4 hours	Distance	No	No	No	Yes	Yes	Yes	No			Within the last 6 months	Glasses	Spectacles
2021-03-09 10:25:32	14-15	Female	Yes	Indo-Trinidad	Rural area	5 years & above	6	Form 2	7	Yes	Phone	0	0	1	2-4 hours	2-4hrs	4-6 hours	4-6hrs	Neither glasses nor contact lenses	0	-1	1	0	0	0	Sitting	4 - 6 hours	I see well both near and distance	No	No	No	Yes	No	No	No			More than 2 years ago	Glasses	Spectacles
2021-03-01 08:34:55	12-13	Male	No	Afro-Trinidadian	Rural area	3-4 years	1	Form 2	7	Yes	Laptop/Macbook	0	1	0	1-2 hours	<2hrs	2-4 hours	2-4hrs	Neither glasses nor contact lenses	0	-1	1	0	0	0	Sitting	2 - 4 hours	I see well both near and distance	No	No	No	No	No	No	No			More than 2 years ago	Glasses	Spectacles
2021-03-02 22:43:07	12-13	Male	Yes	Indo-Trinidad	Urban area	5 years & above	5	Form 2	7	Yes	Desktop	0	1	0	Less than an hour	<2hrs	4-6 hours	4-6hrs	Neither glasses nor contact lenses	0	-1	1	0	0	0	Sitting	More than 6 hours	I see well both near and distance	No	Yes	Yes	No	No	No	No			More than 2 years ago	Glasses	Spectacles
2021-03-23 09:46:00	14-15	Male	Yes	Indo-Trinidad	Urban area	5 years & above	7	Form 3	1	Yes	Phone	0	0	1	More than 6 hours	>6hrs	2-4 hours	2-4hrs	Neither glasses nor contact lenses	0	-1	1	0	0	0	Sitting	1 - 2 hours	I see well both near and distance	No	No	No	No	No	No	No			Within the last year	Glasses	Spectacles
2021-03-24 09:49:10	14-15	Male	Yes	Mixed	Rural area	5 years & above	5	Form 3	1	Yes	Phone	0	0	1	4-6 hours	4-6hrs	4-6 hours	4-6hrs	Neither glasses nor contact lenses	0	-1	0	1	0	0	Laying down	Less than 1 hour	I see well both near and distance	No	No	Yes	Yes	No	No	No			Within the last year	Glasses	Spectacles
2021-03-16 14:14:55	16-17	Female	Yes	Indo-Trinidad	Rural area	5 years & above	2	Form 3	1	Yes	Phone	0	0	1	1-2 hours	<2hrs	4-6 hours	4-6hrs	Neither glasses nor contact lenses	0	-1	1	0	0	0	Sitting	4 - 6 hours	I see well both near and distance	No	No	No	No	No	No	No			More than 2 years ago	Glasses	Spectacles
2021-03-22 10:21:23	14-15	Female	Yes	Other	Urban area	5 years & above	1	Form 3	1	Yes	Phone	0	0	1	2-4 hours	2-4hrs	4-6 hours	4-6hrs	Neither glasses nor contact lenses	0	-1	1	0	0	0	Sitting	More than 6 hours	I see well both near and distance	No	No	No	No	No	No	No			Within the last year	Glasses	Spectacles
2021-03-24 09:37:06	14-15	Male	Yes	Other	Urban area	5 years & above	4	Form 3	1	Yes	Laptop/Macbook	0	1	0	More than 6 hours	>6hrs	8hr	>6hrs	Neither glasses nor contact lenses	0	-1	1	0	0	0	Sitting	More than 6 hours	I see well both near and distance	No	Yes	No	No	Yes	No	No			Within the last 6 months	Glasses	Spectacles
2021-03-23 09:46:53	14-15	Male	Yes	Mixed	Rural area	5 years & above	5	Form 3	1	Yes	Phone	0	0	1	2-4 hours	2-4hrs	4-6 hours	4-6hrs	Glasses	1	0	0	1	0	0	Laying down	Less than 1 hour	I see well both near and distance	No	Yes	Yes	No	No	No	No			Within the last 6 months	Glasses	Spectacles
2021-03-24 10:02:19	14-15	Male	Yes	Indo-Trinidad	Urban area	5 years & above	6	Form 3	1	Yes	Laptop/Macbook	0	1	0	2-4 hours	2-4hrs	4-6 hours	4-6hrs	Neither glasses nor contact lenses	0	-1	1	0	0	0	Sitting	2 - 4 hours	I see well both near and distance	No	No	No	No	No	No	No			Within the last year	Glasses	Spectacles
2021-03-22 10:15:08	14-15	Female	Yes	Indo-Trinidad	Rural area	5 years & above	2	Form 3	1	Yes	Laptop/Macbook	0	1	0	More than 6 hours	>6hrs	4-6 hours	4-6hrs	Neither glasses nor contact lenses	0	-1	0	1	0	0	Laying down	2 - 4 hours	I see well both near and distance	No	Yes	Yes	Yes	Yes	Yes	No			Within the last year	Glasses	Spectacles
2021-03-24 09:02:16	14-15	Male	Yes	Other	Urban area	5 years & above	7	Form 3	2	Yes	Phone	0	0	1	2-4 hours	2-4hrs	4-6 hours	4-6hrs	Neither glasses nor contact lenses	0	0	1	0	0	0	Sitting	More than 6 hours	I see well both near and distance	No	Yes	Yes	Yes	Yes	No	No			Within the last year	Glasses	Spectacles
2021-03-16 15:51:52	14-15	Female	Yes	Mixed	Urban area	5 years & above	5	Form 3	2	Yes	Laptop/Macbook	0	1	0	More than 6 hours	>6hrs	4-6 hours	4-6hrs	Neither glasses nor contact lenses	0	-1	1	0	0	0	Sitting	More than 6 hours	I see well both near and distance	No	Yes	Yes	Yes	Yes	Yes	No			I going for my glasses next week	Glasses	Spectacles
2021-03-28 17:41:12	14-15	Female	Yes	Afro-Trinidadian	Urban area	5 years & above	3	Form 3	2	Yes	Laptop/Macbook	0	1	0	1-2 hours	<2hrs	4-6 hours	4-6hrs	Neither glasses nor contact lenses	0	-1	1	0	0	0	Sitting	4 - 6 hours	I see well both near and distance	No	No	No	No	No	No	No			Within the last year	Glasses	Spectacles
2021-03-26 18:13:18	14-15	Male	Yes	Indo-Trinidad	Urban area	5 years & above	4	Form 3	2	Yes	Tablet/iPad	1	0	0	More than 6 hours	>6hrs	4-6 hours	4-6hrs	Neither glasses nor contact lenses	0	-1	1	1	1	1	Sitting, Standing, Laying down	1 - 2 hours	Distance	No	Yes	No	No	No	No	No			More than a year ago	Glasses	Spectacles
2021-03-22 10:11:50	14-15	Female	Yes	Afro-Trinidadian	Rural area	5 years & above	4	Form 3	2	Yes	Phone	0	0	1	4-6 hours	4-6hrs	Not sure but more!	Unspecified	Neither glasses nor contact lenses	0	-1	0	1	0	0	Laying down	More than 6 hours	I see well both near and distance	No	Yes	No	Yes	Yes	Yes	No			More than 2 years ago	Glasses	Spectacles
2021-03-24 09:58:18	14-15	Male	Yes	Afro-Trinidadian	Rural area	5 years & above	6	Form 3	2	Yes	Laptop/Macbook	0	1	0	1-2 hours	<2hrs	4-6 hours	4-6hrs	Neither glasses nor contact lenses	0	-1	1	0	0	0	Sitting	2 - 4 hours	Distance	No	Yes	No	Yes	No	No	No			More than a year ago	Glasses	Spectacles
2021-03-16 14:19:21	14-15	Female	Yes	Indo-Trinidad	Urban area	5 years & above	7	Form 3	2	Yes	Phone	0	0	1	Less than an hour	<2hrs	4-6 hours	4-6hrs	Neither glasses nor contact lenses	0	-1	1	0	0	0	Sitting	More than 6 hours	I see well both near and distance	No	Yes	No	No	Yes	Yes	No			Within the last year	Glasses	Spectacles
2021-03-16 14:14:37	14-15	Female	Yes	Indo-Trinidad	Rural area	5 years & above	4	Form 3	2	Yes	Laptop/Macbook	0	1	0	Once a week	<2hrs	Plenty, because of online schooling...but i will take breaks in between	Unspecified	Neither glasses nor contact lenses	0	-1	1	0	0	0	Sitting	Less than 1 hour	I see well both near and distance	No	Yes	No	Yes	No	No	No			Within the last 6 months	Glasses	Spectacles
2021-03-22 10:26:15	14-15	Male	Yes	Afro-Trinidadian	Urban area	5 years & above	7	Form 3	2	Yes	Laptop/Macbook	0	1	0	2-4 hours	2-4hrs	4-6 hours	4-6hrs	Neither glasses nor contact lenses	0	-1	1	0	0	0	Sitting	4 - 6 hours	I see well both near and distance	No	Yes	Yes	Yes	Yes	No	No			More than a year ago	Glasses	Spectacles
2021-03-22 10:19:39	14-15	Female	Yes	Mixed	Urban area	5 years & above	7	Form 3	3	Yes	Phone	0	0	1	4-6 hours	4-6hrs	4-6 hours	4-6hrs	Neither glasses nor contact lenses	0	-1	1	0	0	0	Sitting	2 - 4 hours	I see well both near and distance	No	Yes	Yes	Yes	Yes	No	No			Within the last year	Glasses	Spectacles
2021-03-05 10:58:11	16-17	Male	Yes	Afro-Trinidadian	Urban area	5 years & above	7	Form 3	3	Yes	Phone	0	0	1	1-2 hours	<2hrs	0		Neither glasses nor contact lenses	0	-1	1	0	0	0	Sitting	2 - 4 hours	Distance	No	No	Yes	Yes	No	No	No			More than a year ago	Glasses	Spectacles
2021-03-22 10:22:39	14-15	Female	Yes	Indo-Trinidad	Rural area	5 years & above	5	Form 3	3	Yes	Phone	0	0	1	4-6 hours	4-6hrs	4-6 hours	4-6hrs	Neither glasses nor contact lenses	0	-1	0	1	0	0	Laying down	4 - 6 hours	I see well both near and distance	No	No	No	No	Yes	No	No			More than a year ago	Glasses	Spectacles
2021-03-24 09:36:28	14-15	Male	Yes	Afro-Trinidadian	Urban area	5 years & above	7	Form 3	3	Yes	Desktop	0	1	0	More than 6 hours	>6hrs	10 hours	>6hrs	Neither glasses nor contact lenses	0	-1	1	0	0	0	Sitting	More than 6 hours	I see well both near and distance	No	Yes	No	No	Yes	No	No			Last month	Glasses	Spectacles
2021-03-16 14:04:44	16-17	Female	No	Indo-Trinidad	Rural area	5 years & above	7	Form 3	3	Yes	Laptop/Macbook	0	1	0	2-4 hours	2-4hrs	More than 6 hours	>6hrs	Neither glasses nor contact lenses	0	-1	1	1	0	1	Sitting, Laying down	1 - 2 hours	I see well both near and distance	No	No	No	No	No	Yes	No			I last took a eye exam was 9 or 10 years ago	Glasses	Spectacles
2021-03-24 10:06:24	14-15	Male	Yes	Mixed	Rural area	5 years & above	1	Form 3	4	Yes	Laptop/Macbook	0	1	0	1-2 hours	<2hrs	1-2 hours	<2hrs	Neither glasses nor contact lenses	0	0	1	0	0	0	Sitting	1 - 2 hours	I see well both near and distance	No	Yes	No	No	Yes	No	No			Within the last year	Glasses	Spectacles
2021-03-24 09:44:07	14-15	Male	Yes	Mixed	Urban area	5 years & above	1	Form 3	4	Yes	Desktop	0	1	0	2-4 hours	2-4hrs	4-6 hours	4-6hrs	Neither glasses nor contact lenses	0	-1	1	0	0	0	Sitting	More than 6 hours	I see well both near and distance	No	No	No	No	No	No	No			Within the last year	Glasses	Spectacles
2021-03-22 10:21:35	14-15	Female	Yes	Mixed	Rural area	5 years & above	4	Form 3	4	Yes	Laptop/Macbook	0	1	0	1-2 hours	<2hrs	4-6 hours	4-6hrs	Neither glasses nor contact lenses	0	0	1	0	0	0	Sitting	2 - 4 hours	I see well both near and distance	No	Yes	No	No	No	No	No			Within the last 6 months	Glasses	Spectacles
2021-03-22 11:29:59	14-15	Male	Yes	Afro-Trinidadian	Urban area	5 years & above	4	Form 3	4	Yes	Laptop/Macbook	0	1	0	2-4 hours	2-4hrs	4-6 hours	4-6hrs	Neither glasses nor contact lenses	0	-1	1	0	0	0	Sitting	Less than 1 hour	I see well both near and distance	No	No	No	No	No	No	No			More than a year ago	Glasses	Spectacles
2021-03-17 10:09:56	16-17	Female	No	Indo-Trinidad	Rural area	5 years & above	1	Form 3	5	Yes	Laptop/Macbook	0	1	0	2-4 hours	2-4hrs	More than 6 hours	>6hrs	Neither glasses nor contact lenses	0	-1	1	1	0	1	Sitting, Laying down	1 - 2 hours	I see well both near and distance	No	Yes	Yes	Yes	No	No	No			Within the last 6 months	Glasses	Spectacles
2021-03-24 09:18:53	14-15	Male	Yes	Indo-Trinidad	Rural area	5 years & above	4	Form 3	5	Yes	Laptop/Macbook	0	1	0	Less than an hour	<2hrs	4-6 hours	4-6hrs	Neither glasses nor contact lenses	0	-1	1	0	0	0	Sitting	4 - 6 hours	Distance	No	No	No	No	No	No	No			More than a year ago	Glasses	Spectacles
2021-03-16 14:12:26	14-15	Female	Yes	Other	Rural area	5 years & above	3	Form 3	5	Yes	Laptop/Macbook	0	1	0	Less than an hour	<2hrs	8 hrs and above	>6hrs	Neither glasses nor contact lenses	0	0	1	0	0	0	Sitting	4 - 6 hours	I see well both near and distance	No	Yes	No	No	Yes	No	No			Within the last year	Glasses	Spectacles
2021-03-22 10:38:15	14-15	Male	Yes	Mixed	Rural area	5 years & above	3	Form 3	5	Yes	Phone	0	0	1	1-2 hours	<2hrs	4-6 hours	4-6hrs	Neither glasses nor contact lenses	0	0	1	0	0	0	Sitting	1 - 2 hours	I see well both near and distance	No	Yes	Yes	Yes	No	No	No			Within the last year	Glasses	Spectacles
2021-03-16 14:05:15	14-15	Female	Yes	Other	Rural area	5 years & above	4	Form 3	5	Yes	Laptop/Macbook	0	1	0	1-2 hours	<2hrs	9-10	>6hrs	Neither glasses nor contact lenses	0	-1	1	0	0	0	Sitting	More than 6 hours	I see well both near and distance	No	No	No	No	No	No	No			Within the last 6 months	Glasses	Spectacles
2021-03-24 09:58:31	14-15	Male	Yes	Indo-Trinidad	Urban area	5 years & above	5	Form 3	5	Yes	Tablet/iPad	1	0	0	More than 6 hours	>6hrs	4-6 hours	4-6hrs	Neither glasses nor contact lenses	0	-1	1	1	1	1	Sitting, Standing, Laying down	1 - 2 hours	Distance	No	Yes	No	No	No	No	No			Within the last 6 months	Glasses	Spectacles
2021-03-24 09:03:41	14-15	Male	Yes	Indo-Trinidad	Urban area	5 years & above	3	Form 3	5	Yes	Laptop/Macbook	0	1	0	4-6 hours	4-6hrs	1-2 hours	<2hrs	Neither glasses nor contact lenses	0	-1	1	0	0	0	Sitting	1 - 2 hours	I see well both near and distance	No	Yes	Yes	Yes	Yes	Yes	No			Within the last 6 months	Glasses	Spectacles
2021-03-22 10:36:15	14-15	Male	Yes	Other	Urban area	5 years & above	2	Form 3	5	Yes	Phone	0	0	1	1-2 hours	<2hrs	Only 4 hours,1 hour a class the rest of the day will not be on it as much	<2hrs	Neither glasses nor contact lenses	0	-1	1	0	0	0	Sitting	1 - 2 hours	I see well both near and distance	No	No	Yes	No	Yes	No	No			Within the last year	Glasses	Spectacles
2021-03-19 15:20:44	14-15	Female	Yes	Indo-Trinidad	Rural area	5 years & above	1	Form 3	5	Yes	Laptop/Macbook	0	1	0	2-4 hours	2-4hrs	8hrs	>6hrs	Neither glasses nor contact lenses	0	0	1	0	0	0	Sitting	4 - 6 hours	I see well both near and distance	No	Yes	Yes	Yes	Yes	No	No			Within the last year	Glasses	Spectacles
2021-03-23 10:40:49	16-17	Male	No	Other	Urban area	5 years & above	3	Form 3	5	Yes	Phone	0	0	1	1-2 hours	<2hrs	2-4 hours	2-4hrs	Neither glasses nor contact lenses	0	-1	1	0	0	0	Sitting	2 - 4 hours	Near	No	Yes	No	No	No	No	No			Within the last 6 months	Glasses	Spectacles
2021-03-22 10:28:11	14-15	Male	Yes	Afro-Trinidadian	Urban area	5 years & above	7	Form 3	5	Yes	Laptop/Macbook	0	1	0	More than 6 hours	>6hrs	1-2 hours	<2hrs	Neither glasses nor contact lenses	0	-1	1	0	0	0	Sitting	More than 6 hours	I see well both near and distance	No	Yes	Yes	Yes	Yes	No	No			Within the last year	Glasses	Spectacles
2021-03-16 14:12:53	14-15	Female	Yes	Indo-Trinidad	Urban area	5 years & above	1	Form 3	6	Yes	Phone	0	0	1	1-2 hours	<2hrs	4-6 hours	4-6hrs	Neither glasses nor contact lenses	0	-1	1	1	0	1	Sitting, Laying down	2 - 4 hours	Distance	No	Yes	No	No	Yes	No	No			More than a year ago	Glasses	Spectacles
2021-03-24 09:17:49	14-15	Male	Yes	Other	Urban area	5 years & above	3	Form 3	6	Yes	Phone	0	0	1	4-6 hours	4-6hrs	2-4 hours	2-4hrs	Neither glasses nor contact lenses	0	-1	0	1	0	0	Laying down	More than 6 hours	I see well both near and distance	No	No	No	No	No	No	No			Within the last year	Glasses	Spectacles
2021-03-16 14:11:05	14-15	Female	Yes	Indo-Trinidad	Urban area	5 years & above	2	Form 3	6	Yes	Tablet/iPad	1	0	0	Not sure	Unspecified	4-6 hours	4-6hrs	Neither glasses nor contact lenses	0	-1	1	0	0	0	Sitting	4 - 6 hours	I see well both near and distance	No	No	No	No	No	No	No			Within the last year	Glasses	Spectacles
2021-03-24 09:14:12	14-15	Male	Yes	Mixed	Urban area	5 years & above	7	Form 3	6	Yes	Phone	0	0	1	2-4 hours	2-4hrs	4-6 hours	4-6hrs	Neither glasses nor contact lenses	0	-1	1	0	0	0	Sitting	Less than 1 hour	I see well both near and distance	No	Yes	Yes	Yes	No	No	No			Within the last 6 months	Glasses	Spectacles
2021-03-24 09:22:07	14-15	Female	Yes	Indo-Trinidad	Urban area	5 years & above	5	Form 3	6	Yes	Tablet/iPad	1	0	0	4-6 hours	4-6hrs	4-6 hours	4-6hrs	Neither glasses nor contact lenses	0	-1	1	0	0	0	Sitting	2 - 4 hours	I see well both near and distance	No	Yes	Yes	Yes	No	No	No			Within the last year	Glasses	Spectacles
2021-03-12 14:31:34	14-15	Female	Yes	Indo-Trinidad	Urban area	5 years & above	3	Form 3	6	Yes	Laptop/Macbook	0	1	0	4-6 hours	4-6hrs	14 hours	>6hrs	Neither glasses nor contact lenses	0	-1	1	1	0	1	Sitting, Laying down	More than 6 hours	I see well both near and distance	No	No	No	No	No	No	No			Within the last 6 months	Glasses	Spectacles
2021-03-22 10:24:05	14-15	Female	Yes	Mixed	Urban area	5 years & above	6	Form 3	6	Yes	Phone	0	0	1	More than 6 hours	>6hrs	4-6 hours	4-6hrs	Neither glasses nor contact lenses	0	-1	1	0	0	0	Sitting	4 - 6 hours	I see well both near and distance	No	Yes	No	Yes	Yes	Yes	No			More than a year ago	Glasses	Spectacles
2021-03-22 10:21:44	14-15	Male	Yes	Mixed	Urban area	5 years & above	7	Form 3	6	Yes	Laptop/Macbook	0	1	0	2-4 hours	2-4hrs	4-6 hours	4-6hrs	Neither glasses nor contact lenses	0	-1	1	1	0	1	Sitting, Laying down	2 - 4 hours	I see well both near and distance	No	Yes	No	No	No	No	No			Within the last year	Glasses	Spectacles
2021-03-22 13:39:41	14-15	Male	No	Afro-Trinidadian	Urban area	5 years & above	3	Form 3	6	Yes	Laptop/Macbook	0	1	0	More than 6 hours	>6hrs	4-6 hours	4-6hrs	Glasses	1	1	1	0	0	0	Sitting	2 - 4 hours	Distance	No	Yes	Yes	Yes	Yes	Yes	No			Within the last year	Glasses and Eye Drops	Spectacles
2021-03-24 08:59:50	14-15	Male	Yes	Other	Rural area	5 years & above	6	Form 3	6	Yes	Phone	0	0	1	1-2 hours	<2hrs	13hours+	>6hrs	Neither glasses nor contact lenses	0	-1	1	0	0	0	Sitting	4 - 6 hours	I see well both near and distance	No	Yes	Yes	No	Yes	No	No			Within the last year	Glasses	Spectacles
2021-03-24 09:12:15	14-15	Male	Yes	Other	Rural area	5 years & above	5	Form 3	6	Yes	Tablet/iPad	1	0	0	1-2 hours	<2hrs	4-6 hours	4-6hrs	Neither glasses nor contact lenses	0	-1	1	1	0	1	Sitting, Laying down	2 - 4 hours	I see well both near and distance	No	Yes	No	No	No	No	No			Within the last 6 months	Glasses	Spectacles
2021-03-24 09:15:15	14-15	Male	Yes	Indo-Trinidad	Rural area	5 years & above	4	Form 3	7	Yes	Laptop/Macbook	0	1	0	Less than an hour	<2hrs	4-6 hours	4-6hrs	Neither glasses nor contact lenses	0	0	1	0	0	0	Sitting	More than 6 hours	I see well both near and distance	No	Yes	No	No	No	No	No			Within the last year	Glasses	Spectacles
2021-03-16 20:14:07	14-15	Female	Yes	Indo-Trinidad	Rural area	5 years & above	6	Form 3	7	Yes	Laptop/Macbook	0	1	0	2-4 hours	2-4hrs	4-6 hours	4-6hrs	Neither glasses nor contact lenses	0	-1	1	0	0	0	Sitting	4 - 6 hours	Distance	No	Yes	Yes	No	Yes	No	No			More than a year ago	Glasses	Spectacles
2021-03-23 12:03:44	16-17	Male	Yes	Afro-Trinidadian	Rural area	5 years & above	1	Form 3	7	Yes	Phone	0	0	1	2-4 hours	2-4hrs	4-6 hours	4-6hrs	Neither glasses nor contact lenses	0	-1	1	0	0	0	Sitting	4 - 6 hours	I see well both near and distance	No	No	No	No	No	No	No			Within the last 6 months	Glasses	Spectacles
2021-03-22 10:14:57	14-15	Male	Yes	Mixed	Rural area	5 years & above	4	Form 3	7	Yes	Laptop/Macbook	0	1	0	4-6 hours	4-6hrs	10	>6hrs	Neither glasses nor contact lenses	0	-1	1	1	0	1	Sitting, Laying down	4 - 6 hours	Near	No	Yes	No	Yes	Yes	No	No			More than 2 years ago	Glasses	Spectacles
2021-03-16 14:20:15	14-15	Female	Yes	Indo-Trinidad	Rural area	5 years & above	5	Form 3	7	Yes	Laptop/Macbook	0	1	0	1-2 hours	<2hrs	7	>6hrs	Neither glasses nor contact lenses	0	-1	1	0	0	0	Sitting	2 - 4 hours	I see well both near and distance	No	No	Yes	Yes	No	No	No			Within the last 6 months	Glasses	Spectacles
2021-03-16 14:30:30	14-15	Male	Yes	Indo-Trinidad	Rural area	5 years & above	2	Form 3	7	Yes	Laptop/Macbook	0	1	0	2-4 hours	2-4hrs	4-6 hours	4-6hrs	Neither glasses nor contact lenses	0	-1	1	1	0	1	Sitting, Laying down	1 - 2 hours	Distance	No	Yes	Yes	No	Yes	No	No			More than a year ago	Glasses	Spectacles
2021-03-22 10:16:42	14-15	Female	Yes	Afro-Trinidadian	Urban area	5 years & above	5	Form 3	7	Yes	Laptop/Macbook	0	1	0	4-6 hours	4-6hrs	4-6 hours	4-6hrs	Glasses	1	1	1	0	0	0	Sitting	2 - 4 hours	Distance	No	Yes	Yes	No	Yes	No	No			More than a year ago	Glasses	Spectacles
2021-03-02 19:09:40	14-15	Male	Yes	Afro-Trinidadian	Urban area	5 years & above	5	Form 4	1	Yes	Laptop/Macbook	0	1	0	1-2 hours	<2hrs	4-6 hours	4-6hrs	Neither glasses nor contact lenses	0	-1	1	0	0	0	Sitting	4 - 6 hours	I see well both near and distance	No	Yes	Yes	No	Yes	No	No			More than a year ago	Glasses	Spectacles
2021-03-23 09:05:15	14-15	Male	Yes	Mixed	Rural area	5 years & above	6	Form 4	1	Yes	Phone	0	0	1	More than 6 hours	>6hrs	4-6 hours	4-6hrs	Neither glasses nor contact lenses	0	-1	1	0	0	0	Sitting	4 - 6 hours	Distance	No	Yes	No	No	Yes	Yes	No			Within the last 6 months	Glasses	Spectacles
2021-03-23 09:08:09	14-15	Male	Yes	Mixed	Urban area	5 years & above	2	Form 4	1	Yes	Laptop/Macbook	0	1	0	2-4 hours	2-4hrs	4-6 hours	4-6hrs	Neither glasses nor contact lenses	0	-1	0	1	0	0	Laying down	Less than 1 hour	I see well both near and distance	No	Yes	Yes	No	Yes	No	No			More than a year ago	Glasses	Spectacles
2021-03-23 09:08:49	14-15	Male	Yes	Indo-Trinidad	Urban area	5 years & above	4	Form 4	2	Yes	Laptop/Macbook	0	1	0	More than 6 hours	>6hrs	4-6 hours	4-6hrs	Neither glasses nor contact lenses	0	-1	1	0	0	0	Sitting	4 - 6 hours	I see well both near and distance	No	No	No	No	No	No	No			Within the last 6 months	Glasses	Spectacles
2021-03-23 09:07:29	16-17	Male	Yes	Indo-Trinidad	Rural area	5 years & above	7	Form 4	2	Yes	Laptop/Macbook	0	1	0	1-2 hours	<2hrs	2-4 hours	2-4hrs	Glasses	1	1	1	0	0	0	Sitting	Less than 1 hour	I see well both near and distance	No	Yes	Yes	No	Yes	No	No			More than a year ago	Glasses	Spectacles
2021-03-02 18:17:33	14-15	Male	Yes	Indo-Trinidad	Urban area	5 years & above	5	Form 4	2	Yes	Phone	0	0	1	More than 6 hours	>6hrs	16-18 houra	>6hrs	Glasses	1	1	0	1	0	0	Laying down	More than 6 hours	Distance	No	Yes	Yes	No	Yes	No	No			Within the last year	Glasses	Spectacles
2021-03-02 21:01:10	16-17	Female	Yes	Indo-Trinidad	Urban area	5 years & above	2	Form 4	2	Yes	Laptop/Macbook	0	1	0	2-4 hours	2-4hrs	9+ hours	>6hrs	Neither glasses nor contact lenses	0	-1	0	1	0	0	Laying down	4 - 6 hours	I see well both near and distance	No	Yes	Yes	No	Yes	No	No			More than a year ago	Glasses	Spectacles
2021-03-02 20:18:39	14-15	Female	Yes	Mixed	Rural area	5 years & above	1	Form 4	3	Yes	Laptop/Macbook	0	1	0	More than 6 hours	>6hrs	4-6 hours	4-6hrs	Glasses	1	1	1	0	0	0	Sitting	1 - 2 hours	Distance	No	Yes	Yes	Yes	Yes	Yes	No			More than 2 years ago	blue light glasses were recommended	Spectacles
2021-03-16 14:10:15	16-17	Female	No	Indo-Trinidad	Rural area	5 years & above	2	Form 4	3	Yes	Laptop/Macbook	0	1	0	2-4 hours	2-4hrs	More than 10	>6hrs	Neither glasses nor contact lenses	0	-1	1	1	0	1	Sitting, Laying down	1 - 2 hours	Distance	No	No	Yes	Yes	No	No	No			Within the last 6 months	Glasses	Spectacles
2021-03-02 19:27:27	14-15	Female	Yes	Mixed	Rural area	5 years & above	5	Form 4	3	Yes	Laptop/Macbook	0	1	0	More than 6 hours	>6hrs	4-6 hours	4-6hrs	Glasses	1	1	1	0	0	0	Sitting	1 - 2 hours	Distance	No	Yes	Yes	No	No	No	No			Within the last year	Glasses	Spectacles
2021-03-23 09:05:06	16-17	Male	Yes	Indo-Trinidad	Urban area	5 years & above	1	Form 4	3	Yes	Laptop/Macbook	0	1	0	More than 6 hours	>6hrs	2-4 hours	2-4hrs	Neither glasses nor contact lenses	0	-1	1	0	0	0	Sitting	1 - 2 hours	I see well both near and distance	No	No	No	No	No	No	No			Within the last 6 months	Glasses	Spectacles
2021-03-23 09:02:13	14-15	Male	Yes	Afro-Trinidadian	Urban area	5 years & above	3	Form 4	3	Yes	Laptop/Macbook	0	1	0	2-4 hours	2-4hrs	4-6 hours	4-6hrs	Neither glasses nor contact lenses	0	-1	1	0	0	0	Sitting	2 - 4 hours	I see well both near and distance	No	Yes	No	No	Yes	Yes	No			Within the last 6 months	Glasses	Spectacles
2021-03-16 16:28:03	16-17	Female	Yes	Indo-Trinidad	Urban area	5 years & above	6	Form 4	3	Yes	Phone	0	0	1	1-2 hours	<2hrs	9 hours	>6hrs	Neither glasses nor contact lenses	0	-1	1	0	0	0	Sitting	More than 6 hours	I see well both near and distance	No	Yes	No	No	No	No	No			Within the last year	Glasses	Spectacles
2021-03-03 14:10:11	16-17	Female	Yes	Indo-Trinidad	Urban area	5 years & above	6	Form 4	4	Yes	Laptop/Macbook	0	1	0	2-4 hours	2-4hrs	9+ hours	>6hrs	Neither glasses nor contact lenses	0	-1	0	1	0	0	Laying down	4 - 6 hours	I see well both near and distance	No	Yes	Yes	Yes	Yes	Yes	No			Within the last year	Glasses	Spectacles
2021-03-02 18:33:49	16-17	Prefer not to say	Yes	Afro-Trinidadian	Urban area	5 years & above	1	Form 4	4	Yes	Tablet/iPad	1	0	0	2-4 hours	2-4hrs	4-6 hours	4-6hrs	Glasses	1	1	1	1	0	1	Sitting, Laying down	4 - 6 hours	Distance	No	No	Yes	Yes	Yes	Yes	No			Within the last year	School	Others
2021-03-16 14:07:54	14-15	Female	Yes	Mixed	Rural area	5 years & above	1	Form 4	5	Yes	Laptop/Macbook	0	1	0	2-4 hours	2-4hrs	more than 6 hours	>6hrs	Neither glasses nor contact lenses	0	-1	1	0	0	0	Sitting	More than 6 hours	I see well both near and distance	No	No	No	No	No	No	No			Within the last year	I just went to check my eyes	Others
2021-03-02 18:27:56	14-15	Female	Yes	Indo-Trinidad	Rural area	5 years & above	3	Form 4	5	Yes	Desktop	0	1	0	More than 6 hours	>6hrs	4-6 hours	4-6hrs	Glasses	1	1	1	0	0	0	Sitting	More than 6 hours	Distance	No	Yes	Yes	No	Yes	Yes	No			More than 2 years ago	none	None
2021-03-08 16:18:04	14-15	Female	Yes	Indo-Trinidad	Urban area	5 years & above	1	Form 4	5	Yes	Laptop/Macbook	0	1	0	2-4 hours	2-4hrs	10 hours	>6hrs	Neither glasses nor contact lenses	0	-1	1	0	0	0	Sitting	More than 6 hours	I see well both near and distance	No	Yes	No	Yes	No	No	No			More than a year ago	It was an annual thing in primary school.	None
2021-03-07 22:51:01	16-17	Male	Yes	Mixed	Urban area	5 years & above	1	Form 4	5	Yes	Laptop/Macbook	0	1	0	4-6 hours	4-6hrs	4-6 hours	4-6hrs	Neither glasses nor contact lenses	0	-1	0	1	0	0	Laying down	Less than 1 hour	I see well both near and distance	No	No	No	No	No	No	No			More than 2 years ago	I have no nature treatment	None
2021-03-08 15:49:55	14-15	Male	Yes	Mixed	Urban area	5 years & above	5	Form 4	5	Yes	Laptop/Macbook	0	1	0	2-4 hours	2-4hrs	4-6 hours	4-6hrs	Neither glasses nor contact lenses	0	-1	1	0	0	0	Sitting	4 - 6 hours	I see well both near and distance	No	Yes	No	No	No	No	No			More than 2 years ago	Nothing	None
2021-03-02 21:05:28	14-15	Male	Yes	Indo-Trinidad	Rural area	5 years & above	7	Form 4	6	Yes	Tablet/iPad	1	0	0	1-2 hours	<2hrs	4-6 hours	4-6hrs	Neither glasses nor contact lenses	0	-1	1	0	0	0	Sitting	More than 6 hours	I see well both near and distance	No	No	No	No	No	No	No			More than 2 years ago	Nothing	None
2021-03-02 19:21:31	14-15	Male	Yes	Indo-Trinidad	Rural area	5 years & above	7	Form 4	6	Yes	Laptop/Macbook	0	1	0	2-4 hours	2-4hrs	4-6 hours	4-6hrs	Neither glasses nor contact lenses	0	-1	1	0	0	0	Sitting	More than 6 hours	I see well both near and distance	No	Yes	Yes	Yes	No	No	No			Never had an eye exam	None	None
2021-03-06 08:54:24	16-17	Male	Yes	Mixed	Rural area	5 years & above	1	Form 4	7	Yes	Laptop/Macbook	0	1	0	4-6 hours	4-6hrs	7	>6hrs	Neither glasses nor contact lenses	0	0	1	0	0	0	Sitting	2 - 4 hours	I see well both near and distance	No	No	No	No	No	No	No			Cant remember	None	None
2021-03-11 16:31:40	16-17	Female	Yes	Mixed	Urban area	Less than 1 year	5	Form 4	7	Yes	Laptop/Macbook	0	1	0	More than 6 hours	>6hrs	12-13 hours	>6hrs	Neither glasses nor contact lenses	0	-1	1	0	0	0	Sitting	4 - 6 hours	I see well both near and distance	No	No	No	No	No	No	No			More than 2 years ago	Check up	No treatment
2021-03-06 16:36:29	16-17	Male	Yes	Mixed	Urban area	5 years & above	1	Form 5	2	Yes	Phone	0	0	1	4-6 hours	4-6hrs	8-10 hours	>6hrs	Neither glasses nor contact lenses	0	-1	0	1	0	0	Laying down	More than 6 hours	Distance	No	Yes	Yes	Yes	Yes	Yes	No			Never had an eye exam	None of the above	No treatment
2021-03-08 22:56:02	16-17	Female	Yes	Mixed	Urban area	5 years & above	6	Form 5	2	Yes	Laptop/Macbook	0	1	0	1-2 hours	<2hrs	4-6 hours	4-6hrs	Neither glasses nor contact lenses	0	-1	0	0	0	0	Other	Less than 1 hour	I see well both near and distance	No	No	No	No	No	No	No			Primary school	Didn't take any treatment	No treatment
2021-03-16 14:12:21	16-17	Female	Yes	Indo-Trinidad	Rural area	5 years & above	2	Form 5	3	Yes	Laptop/Macbook	0	1	0	4-6 hours	4-6hrs	9 hours	>6hrs	Neither glasses nor contact lenses	0	-1	1	0	0	0	Sitting	4 - 6 hours	Distance	No	Yes	No	No	No	No	No			More than a year ago	eye test	No treatment
2021-03-22 11:05:14	18-19	Male	Yes	Mixed	Urban area	5 years & above	3	Form 5	3	Yes	Desktop	0	1	0	4-6 hours	4-6hrs	2-4 hours	2-4hrs	Glasses	1	1	1	0	0	0	Sitting	More than 6 hours	I see well both near and distance	No	Yes	Yes	No	No	No	No			More than a year ago	my eyes were fine(no treatment needed)	No treatment
2021-03-16 14:16:11	18-19	Female	Yes	Indo-Trinidad	Rural area	5 years & above	5	Form 5	4	Yes	Desktop	0	1	0	4-6 hours	4-6hrs	4-6 hours	4-6hrs	Neither glasses nor contact lenses	0	-1	1	0	0	0	Sitting	2 - 4 hours	I see well both near and distance	No	Yes	No	No	Yes	No	No			More than 2 years ago	No treatment necessary	No treatment
2021-03-06 19:16:22	16-17	Male	Yes	Mixed	Urban area	5 years & above	1	Form 5	4	Yes	Phone	0	0	1	4-6 hours	4-6hrs	8-10 hours	>6hrs	Neither glasses nor contact lenses	0	-1	0	1	0	0	Laying down	More than 6 hours	Distance	No	No	No	No	Yes	No	No			Within the last 6 months	Results were my eyes are fine	No treatment
2021-03-05 17:51:08	16-17	Male	Yes	Indo-Trinidad	Rural area	5 years & above	3	Form 5	6	Yes	Phone	0	0	1	2-4 hours	2-4hrs	4-6 hours	4-6hrs	Neither glasses nor contact lenses	0	-1	1	0	0	0	Sitting	4 - 6 hours	I see well both near and distance	No	No	No	No	No	No	No			More than 2 years ago	Check up	No treatment
2021-03-22 11:13:15	16-17	Female	Yes	Afro-Trinidadian	Urban area	5 years & above	3	Form 5	6	Yes	Desktop	0	1	0	4-6 hours	4-6hrs	8-10	>6hrs	Neither glasses nor contact lenses	0	-1	1	0	0	0	Sitting	More than 6 hours	I see well both near and distance	No	Yes	No	No	No	No	No			More than 2 years ago	Eye drops	Medication
2021-03-06 10:25:06	16-17	Male	Yes	Mixed	Urban area	5 years & above	4	Form 5	6	Yes	Phone	0	0	1	4-6 hours	4-6hrs	8-10 hours	>6hrs	Neither glasses nor contact lenses	0	-1	0	1	0	0	Laying down	More than 6 hours	Distance	No	Yes	Yes	Yes	No	No	No			February	Eye drops	Medication
2021-03-23 15:17:29	16-17	Male	Yes	Indo-Trinidad	Urban area	5 years & above	5	Form 5	6	Yes	Laptop/Macbook	0	1	0	2-4 hours	2-4hrs	1-2 hours	<2hrs	Neither glasses nor contact lenses	0	-1	1	0	0	0	Sitting	More than 6 hours	Near	No	Yes	Yes	Yes	Yes	Yes	No			More than 2 years ago	Eye drops	Medication
2021-03-06 08:38:57	16-17	Male	Yes	Afro-Trinidadian	Urban area	5 years & above	2	Form 5	7	Yes	Phone	0	0	1	2-4 hours	2-4hrs	4-6 hours	4-6hrs	Neither glasses nor contact lenses	0	0	1	0	0	0	Sitting	Less than 1 hour	Distance	No	Yes	No	No	No	No	No			Within the last year	Eye drops	Medication
2021-03-23 14:24:34	18-19	Female	Yes	Afro-Trinidadian	Urban area	5 years & above	2	Form 6	1	Yes	Laptop/Macbook	0	1	0	2-4 hours	2-4hrs	About 8-10 hours	>6hrs	Glasses	1	1	1	0	0	0	Sitting	4 - 6 hours	Distance	No	No	No	No	No	No	No			More than a year ago	Eye drops	Medication
2021-03-09 22:29:14	16-17	Female	Yes	Indo-Trinidad	Rural area	5 years & above	1	Form 6	1	Yes	Laptop/Macbook	0	1	0	2-4 hours	2-4hrs	More than 10 hours	>6hrs	Neither glasses nor contact lenses	0	-1	1	0	0	0	Sitting	More than 6 hours	I see well both near and distance	No	Yes	Yes	Yes	Yes	No	No			More than 2 years ago	Eye drops	Medication
2021-03-24 10:56:48	18-19	Prefer not to say	Yes	Indo-Trinidad	Rural area	5 years & above	1	Form 6	1	Yes	Laptop/Macbook	0	1	0	2-4 hours	2-4hrs	4-6 hours	4-6hrs	Neither glasses nor contact lenses	0	-1	1	0	0	0	Sitting	2 - 4 hours	I see well both near and distance	No	Yes	Yes	No	No	Yes	No			More than 2 years ago	Eye drops	Medication
2021-03-22 11:06:41	16-17	Male	Yes	Mixed	Rural area	5 years & above	2	Form 6	1	Yes	Phone	0	0	1	4-6 hours	4-6hrs	7 hours +	>6hrs	Neither glasses nor contact lenses	0	-1	1	1	0	1	Sitting, Laying down	Less than 1 hour	I see well both near and distance	No	Yes	Yes	Yes	Yes	No	No			More than 2 years ago	Medication	Medication
2021-03-02 19:33:36	18-19	Male	Yes	Afro-Trinidadian	Urban area	5 years & above	2	Form 6	2	Yes	Laptop/Macbook	0	1	0	4-6 hours	4-6hrs	9-12	>6hrs	Glasses	1	1	1	1	0	1	Sitting, Laying down	2 - 4 hours	Near	No	No	No	No	No	No	No			More than a year ago	Eye drops	Medication
2021-03-02 21:47:37	16-17	Male	Yes	Mixed	Rural area	5 years & above	6	Form 6	2	Yes	Laptop/Macbook	0	1	0	2-4 hours	2-4hrs	4-6 hours	4-6hrs	Glasses	1	1	1	0	0	0	Sitting	2 - 4 hours	Distance	No	Yes	No	No	Yes	No	No			More than a year ago	Eye drops	Medication
2021-03-02 19:31:55	16-17	Male	Yes	Mixed	Rural area	5 years & above	4	Form 6	2	Yes	Laptop/Macbook	0	1	0	More than 6 hours	>6hrs	above 6	>6hrs	Glasses	1	1	1	0	0	0	Sitting	2 - 4 hours	Distance	No	Yes	No	No	Yes	No	No			Within the last year	Eye drops	Medication
2021-03-02 19:27:50	18-19	Male	Yes	Indo-Trinidad	Urban area	5 years & above	4	Form 6	3	Yes	Phone	0	0	1	1-2 hours	<2hrs	4-6 hours	4-6hrs	Neither glasses nor contact lenses	0	-1	1	1	0	1	Sitting, Laying down	2 - 4 hours	I see well both near and distance	No	No	No	Yes	No	No	No			Last 2 months	Eye drops	Medication
2021-03-09 13:24:33	16-17	Female	Yes	Indo-Trinidad	Rural area	5 years & above	1	Form 6	3	Yes	Laptop/Macbook	0	1	0	Less than an hour	<2hrs	4-6 hours	4-6hrs	Neither glasses nor contact lenses	0	-1	1	0	0	0	Sitting	4 - 6 hours	I see well both near and distance	No	No	Yes	Yes	No	No	No			Within the last year	Eye drops	Medication
2021-03-03 09:07:37	18-19	Male	Yes	Mixed	Rural area	5 years & above	4	Form 6	4	Yes	Tablet/iPad	1	0	0	1-2 hours	<2hrs	4-6 hours	4-6hrs	Neither glasses nor contact lenses	0	-1	1	1	1	1	Sitting, Standing, Laying down	Less than 1 hour	I see well both near and distance	No	Yes	Yes	Yes	Yes	No	No			Within the last 6 months	Eye drops	Medication
2021-03-26 20:58:31	18-19	Female	Yes	Indo-Trinidad	Rural area	5 years & above	2	Form 6	4	Yes	Laptop/Macbook	0	1	0	2-4 hours	2-4hrs	12 hours	>6hrs	Glasses	1	0	0	1	0	0	Laying down	More than 6 hours	Distance	No	Yes	Yes	Yes	Yes	No	No			Within the last 6 months	Eye drops	Medication
2021-03-04 20:09:10	18-19	Female	Yes	Indo-Trinidad	Urban area	5 years & above	7	Form 6	4	Yes	Laptop/Macbook	0	1	0	2-4 hours	2-4hrs	8-9 hours	>6hrs	Glasses	1	1	1	1	0	1	Sitting, Laying down	1 - 2 hours	Near	No	No	Yes	No	No	No	No			Never had an eye exam
2021-03-16 23:43:26	18-19	Male	Yes	Indo-Trinidad	Rural area	5 years & above	5	Form 6	4	Yes	Phone	0	0	1	4-6 hours	4-6hrs	4-6 hours	4-6hrs	Neither glasses nor contact lenses	0	-1	1	0	0	0	Sitting	2 - 4 hours	Distance	No	Yes	Yes	Yes	No	No	No			Never had an eye exam
2021-03-22 11:24:12	16-17	Female	Yes	Afro-Trinidadian	Urban area	5 years & above	1	Form 6	5	Yes	Desktop	0	1	0	1-2 hours	<2hrs	4-6 hours	4-6hrs	Neither glasses nor contact lenses	0	-1	1	0	0	0	Sitting	More than 6 hours	I see well both near and distance	No	Yes	Yes	Yes	No	No	No			Never had an eye exam
2021-03-23 14:08:41	18-19	Female	Yes	Mixed	Rural area	5 years & above	4	Form 6	5	Yes	Phone	0	0	1	1-2 hours	<2hrs	11 hours	>6hrs	Glasses	1	0	0	1	0	0	Laying down	More than 6 hours	Near	No	Yes	Yes	Yes	No	No	No			Never had an eye exam
2021-03-23 14:16:31	18-19	Female	Yes	Indo-Trinidad	Urban area	5 years & above	2	Form 6	6	Yes	Phone	0	0	1	2-4 hours	2-4hrs	4-6 hours	4-6hrs	Neither glasses nor contact lenses	0	-1	1	0	0	0	Sitting	2 - 4 hours	I see well both near and distance	No	No	No	No	No	No	No			Primary school
2021-03-02 23:31:21	18-19	Female	Yes	Indo-Trinidad	Urban area	Less than 1 year	1	Form 6	6	Yes	Laptop/Macbook	0	1	0	1-2 hours	<2hrs	4-6 hours	4-6hrs	Neither glasses nor contact lenses	0	-1	1	0	1	1	Sitting, Standing	Less than 1 hour	I see well both near and distance	No	Yes	No	Yes	No	No	Yes			More than a year ago
2021-03-16 21:23:31	18-19	Female	Yes	Afro-Trinidadian	Urban area	5 years & above	3	Form 6	6	Yes	Laptop/Macbook	0	1	0	1-2 hours	<2hrs	4-6 hours	4-6hrs	Neither glasses nor contact lenses	0	-1	1	0	0	0	Sitting	4 - 6 hours	I see well both near and distance	No	Yes	Yes	No	Yes	No	No			More than 2 years ago
2021-03-22 10:29:37	18-19	Female	Yes	Mixed	Urban area	5 years & above	3	Form 6	6	Yes	Desktop	0	1	0	Less than an hour	<2hrs	4-6 hours	4-6hrs	Neither glasses nor contact lenses	0	-1	1	0	0	0	Sitting	1 - 2 hours	I see well both near and distance	No	Yes	Yes	Yes	Yes	Yes	No			More than 2 years ago
2021-03-08 15:08:07	16-17	Female	Yes	Mixed	Urban area	5 years & above	2	Form 6	7	Yes	Laptop/Macbook	0	1	0	4-6 hours	4-6hrs	9 hours	>6hrs	Neither glasses nor contact lenses	0	-1	1	1	0	1	Sitting, Laying down	1 - 2 hours	I see well both near and distance	No	Yes	No	No	Yes	No	No			More than 2 years ago
2021-03-16 21:39:08	18-19	Female	Yes	Mixed	Urban area	5 years & above	5	Form 6	7	Yes	Laptop/Macbook	0	1	0	4-6 hours	4-6hrs	4-6 hours	4-6hrs	Glasses	1	1	1	0	0	0	Sitting	4 - 6 hours	Distance	No	Yes	No	No	Yes	Yes	No			More than 2 years ago
2021-03-09 12:45:19	16-17	Female	Yes	Afro-Trinidadian	Urban area	5 years & above	3	Form 6	7	Yes	Laptop/Macbook	0	1	0	More than 6 hours	>6hrs	10-12 hours	>6hrs	Neither glasses nor contact lenses	0	-1	1	0	0	0	Sitting	More than 6 hours	I see well both near and distance	No	No	No	No	No	No	No			More than 2 years ago
2021-03-02 19:39:07	18-19	Male	Yes	Indo-Trinidad	Urban area	5 years & above	4	Form 6	7	Yes	Laptop/Macbook	0	1	0	4-6 hours	4-6hrs	8-10 hours	>6hrs	Glasses	1	1	1	0	0	0	Sitting	2 - 4 hours	Distance	No	Yes	Yes	No	No	No	No			Never had an eye exam
2021-03-05 06:39:43	16-17	Male	Yes	Indo-Trinidad	Urban area	5 years & above	7	Form 6	7	Yes	Laptop/Macbook	0	1	0	2-4 hours	2-4hrs	More than 6 hours	>6hrs	Neither glasses nor contact lenses	0	-1	1	0	0	0	Sitting	1 - 2 hours	I see well both near and distance	No	Yes	Yes	Yes	No	No	No			More than 2 years ago
2021-03-23 14:08:20	18-19	Female	Yes	Mixed	Rural area	5 years & above	7	Form 6	7	Yes	Phone	0	0	1	1-2 hours	<2hrs	11 hours	>6hrs	Glasses	1	0	0	1	0	0	Laying down	More than 6 hours	Near	No	Yes	Yes	Yes	No	No	No			More than 2 years ago
